## **Delta Oscillations Are a Robust Biomarker of Dopamine Depletion Severity and Motor Dysfunction in Awake Mice**

**Timothy C. Whalen<sup>1</sup>, Amanda M. Willard<sup>1,2,3</sup>, Jonathan E. Rubin<sup>1,4</sup>, Aryn H. Gittis<sup>1,2\*</sup>**

<sup>1</sup>Center for the Neural Basis of Cognition and

<sup>2</sup>Department of Biological Sciences and the Neuroscience Institute, Carnegie Mellon University, Pittsburgh, PA 15213

<sup>3</sup>Department of Biology and Geosciences, Clarion University, Clarion, PA 16214

<sup>4</sup>Department of Mathematics, University of Pittsburgh, Pittsburgh, PA 15260

\* To whom correspondence should be addressed:

Mellon Institute, Carnegie Mellon University

4400 Fifth Ave.

Pittsburgh, PA 15213

Tel: 412-268-7229

Fax: 412-268-8423

Email: [agittis@cmu.edu](mailto:agittis@cmu.edu)

## 1 **Abstract**

2           Delta oscillations (0.5–4 Hz) are a robust but often overlooked feature of basal ganglia  
3 pathophysiology in Parkinson’s disease and their relationship to parkinsonian akinesia has not  
4 been investigated. Here, we establish a novel approach to detect spike oscillations embedded in  
5 noise to provide the first study of delta oscillations in awake, dopamine depleted mice. We find  
6 that approximately half of neurons in the substantia nigra reticulata exhibit delta oscillations in  
7 dopamine depletion and that these oscillations are a strong indicator of dopamine loss and  
8 akinesia, outperforming measures such as changes in firing rate, irregularity, bursting and  
9 synchrony. We further establish that these oscillations are caused by the loss of D2 receptor  
10 activation and do not require motor cortex, contrary to previous findings in anesthetized animals.  
11 These results give insight into how dopamine loss leads to dysfunction and suggest a  
12 reappraisal of delta oscillations as a biomarker in Parkinson’s disease.

13

## 14 **Introduction**

15           Parkinson’s disease (PD) is characterized by the loss of dopamine neurons in the  
16 substantia nigra pars compacta (SNc), inducing a state of dopamine depletion (DD) in the basal  
17 ganglia. In human PD patients, this change is accompanied by a striking increase of oscillatory  
18 power in local field potential (LFP) recordings and in the spiking of individual neurons, primarily  
19 in the beta (13-30 Hz) and delta/theta frequencies (1-7 Hz) (Lenz et al., 1988; Levy et al., 2002;  
20 Priori et al., 2004; Steigerwald et al., 2008; Du et al., 2018; Halje et al., 2019).

21           Of these, beta oscillations have been the primary focus of research. In PD studies, beta  
22 oscillations have been shown to correlate with symptom severity (Jenkinson & Brown, 2011)  
23 and tend to dissipate under treatments such as dopamine replacement therapy (Weinberger et  
24 al., 2006; Ray et al., 2008). Similar oscillations are observed in some animal models of PD –  
25 slightly higher in frequency (25-35 Hz) in 6-hydroxydopamine (6-OHDA) lesioned rats or lower  
26 (8-13 Hz) in 1-methyl-4-phenyl-1,2,3,6-tetrahydropyridine (MPTP)-treated monkeys. In these

27 models, the link between beta oscillations and motor symptoms is less clear. Beta oscillations  
28 may arise later than symptoms (Mallet et al., 2008), do not consistently track symptom  
29 progression (Muralidharan et al., 2016) or reduction with treatments such as deep brain  
30 stimulation (DBS) (McConnell et al., 2012), and occur in both parkinsonian and healthy animals  
31 (Connolly et al., 2015). Attempts to artificially induce beta oscillations in these animals have also  
32 been insufficient to cause PD-like symptoms (Swan et al., 2019). Even in humans, DBS studies  
33 have shown conflicting results between the correlation of beta oscillations and motor symptoms  
34 – oscillations tend to weaken during stimulation (Kühn et al., 2006, 2008) but not in every case  
35 (Rossi et al., 2008) or may return before symptoms reemerge (Foffani et al., 2006).

36 In contrast, the lower frequency oscillations observed in human PD patients have been  
37 much less studied, despite occurring in a greater number of neurons than beta oscillations in  
38 some patients or in the absence of beta oscillations at all (Levy et al., 2002; Du et al., 2018;  
39 Zhuang et al., 2019). These delta oscillations are often termed “tremor frequency” oscillations  
40 due to their typical coherence with Parkinsonian tremor (Bergman et al., 1994), but they may  
41 also arise without such coherence (Hurtado et al., 1999). While delta oscillations have an  
42 unclear relationship to tremor, their relationship to other PD symptoms such as bradykinesia  
43 and rigidity has not been investigated.

44 This lack of attention is surprising, as slower oscillations have also been observed in  
45 animal models of PD. In monkeys, oscillations as low as 3-7 Hz have been observed (Raz et al.,  
46 2000; Heimer et al., 2006; McCairn & Turner, 2009), but these have mostly been viewed as an  
47 extension of the beta band. In anesthetized rodents, oscillations at even lower frequencies (0.5–  
48 4 Hz) are most prevalent (Tseng, Kasanetz, Kargieman, Pazo, et al., 2001; Walters et al., 2007;  
49 Parr-Brownlie et al., 2009; Aristieta et al., 2016), but these have been mostly discounted as  
50 artifacts of anesthesia or artificial respiration (Ruskin et al., 2002). Indeed, delta oscillations in  
51 the striatum of 6-OHDA-lesioned rats were shown to have high coherence to anesthesia-  
52 induced slow waves in motor cortex (M1) (Tseng, Kasanetz, Kargieman, Riquelme, et al., 2001;

53 Belluscio et al., 2003) and were weakened after cortical ablation (Magill et al., 2001), leading to  
54 the conclusion that they merely infiltrate the basal ganglia through M1 and are not relevant to  
55 the awake, behaving parkinsonian animal. Experiments investigating the presence of sub-beta  
56 band oscillations in awake, behaving animals have, to our knowledge, not been performed.

57 One factor limiting these investigations is the high levels of noise that contaminate low  
58 frequency signals, particularly during awake recordings. So-called “pink” or “flicker” noise is  
59 most prevalent at low frequencies and typically observed in LFP recordings but is also present  
60 in the spiking of individual neurons. This complication makes reliable detection of oscillations  
61 near or below 2 Hz difficult with current methods.

62 Here, we develop a method to reliably distinguish spike oscillations from noise and use  
63 this approach to characterize the oscillations in the substantia nigra pars reticulata (SNr) of  
64 dopamine depleted mice. We demonstrate that delta, not beta, oscillations are the primary  
65 oscillatory feature in SNr neurons after loss of dopamine, and that they correlate strongly with  
66 PD-like motor deficits. We show that, contrary to prior reports, delta oscillations in the SNr  
67 precede those in M1, and that M1 is not necessary for these oscillations to develop in the SNr.  
68 We also establish that a loss of D2 receptor activation is sufficient to immediately and reversibly  
69 generate both delta oscillations and PD-like akinesia in awake mice, suggesting a direct link  
70 between dopamine loss, delta oscillations, and parkinsonian symptoms. This work indicates that  
71 delta oscillations in basal ganglia neurons are a critical component of parkinsonian pathology in  
72 DD mice and suggests that DD mice may effectively model the low frequency oscillations seen  
73 in PD patients.

74

## 75 **Results**

### 76 **Dopamine depleted mice exhibit 0.5–4 Hz spike oscillations in SNr units**

77 We recorded single units from the substantia nigra pars reticulata (SNr) of awake, head-  
78 fixed mice (Figure 1a–b) that had been bilaterally dopamine depleted with 6-OHDA or saline. To

79 investigate oscillations in the spiking activity of single units, we first examined spike trains and  
80 their autocorrelograms. In control animals, units typically fired in a regular, pacemaking pattern,  
81 indicated by a fast oscillation in their autocorrelograms which corresponded to the interspike  
82 interval of pacemaking and flattened within 20-100 ms (Figure 1c). In contrast, units in bilaterally  
83 dopamine depleted animals exhibited autocorrelograms that showed much slower oscillations  
84 between 0.5 and 4 Hz that remained autocorrelated for several seconds, visible in the raw spike  
85 trains as peaks and troughs or pauses in firing (Figure 1d). These slow oscillations were never  
86 observed in the autocorrelograms of units from control animals.

87

### 88 **Phase shift analysis enables distinction between low frequency oscillations and neural** 89 **noise**

90 We first sought to reliably quantify these oscillations in dopamine depleted mice. Neural  
91 noise is more prevalent in awake than anesthetized animals, and typically manifests in a power  
92 law fashion (called “pink” or “flicker” noise) such that it is dominant in low frequencies. Since the  
93 oscillations we observe in SNr units in DD were in the range typically tainted by pink noise, we  
94 could not reliably detect them using standard approaches based solely on the power spectral  
95 density or transformations of it. Specifically, random peaks in the power spectral density atop  
96 pink noise, or the pink noise itself, can easily be misidentified as an oscillation of interest (Figure  
97 2c).

98 To overcome false positive detections, we used both the power and phase information  
99 provided by the short time Fourier transform to identify oscillatory components of spike trains  
100 with consistent phase over time (see Methods). By requiring that an oscillation have both high  
101 spectral power and low phase shift (Figure 2a), we successfully distinguished the oscillations of  
102 interest embedded in pink noise from the noise itself (Figure 2b). Notably, spike trains that  
103 exhibit a relatively flat autocorrelation but have delta peaks in their PSD are successfully  
104 disregarded as oscillators when phase shift analysis is applied (Figure 2c).

105 **Delta, not beta, oscillations in SNr units are a marker of dopamine depletion**

106 Using this detection method, we observed that very few SNr units from control animals  
107 exhibit an oscillation in the 0.5–4 Hz range (2 of 85 units pooled across animals), whereas in  
108 each bilaterally dopamine depleted animal, 33–92% of units exhibited significant delta  
109 oscillations (117 of 226 units pooled) three days after depletion (Figure 3a). Without using the  
110 phase shift criterion, a much greater number of units were flagged as oscillating, particularly in  
111 control mice (28% of units vs 2% after phase shift correction, Figure 3b), despite these units  
112 having a nearly flat autocorrelation as in Figure 2c. To determine whether these oscillations  
113 remained stable at longer time points after depletion, we recorded from the SNr of unilaterally  
114 depleted mice, 2-4 weeks after depletion. We found that a significant proportion of SNr neurons  
115 still exhibited delta oscillations at these later time points (22–82% for each animal, 48 of 83 units  
116 pooled), suggesting that these oscillations are a stable feature of basal ganglia pathophysiology  
117 following dopamine depletion. A small number of units on the contralateral side of the lesion  
118 also exhibited delta oscillations (0–19% for each animal, 7 of 72 units pooled) (Supplemental  
119 Figure 1).

120 To ensure that delta oscillations were not merely an immune or inflammatory side effect  
121 of the injected toxin or cell death, we treated a cohort of animals intraperitoneally with reserpine,  
122 a compound that blocks the vesicular monoamine transporter 2 (VMAT2) complex from  
123 packaging monoamines into vesicles. This yielded a monoamine (including dopamine) depletion  
124 without any intracranial injection or cellular death and produced akinetic symptoms similar to  
125 those observed in bilateral 6-OHDA depleted mice. When we recorded three days after the start  
126 of daily reserpine injections, these animals exhibited a high proportion of slowly oscillating units  
127 in the SNr (33-100% for each animal, 74 of 119 units pooled), similar to bilaterally depleted  
128 animals (Figure 3a).

129 Given the prevalence of beta oscillations in the DD and PD literature, we sought to  
130 determine if these animals' SNr units also exhibited beta oscillations. We defined a wide

131 frequency range for beta oscillations, 7–35 Hz, which fully encompasses the definition of beta  
132 oscillations across humans and common model species (monkey and rat). We saw no increase  
133 in the fraction of beta oscillating units after any form of dopamine depletion, with or without our  
134 phase shift criterion (Figure 3c–d). Taken together, our results suggest that delta, not beta,  
135 oscillations are the primary oscillatory feature in SNr spike trains of awake, dopamine depleted  
136 mice.

137

### 138 **Oscillations predict DD severity and behavior better than other physiological measures** 139 **of dysfunction**

140 To understand how delta oscillations relate to the severity of dopamine depletion, we  
141 used an existing dataset of SNr recordings from mice gradually depleted to varying levels of  
142 dopamine loss through successive small injections of 6-OHDA (Willard et al., 2019). In this data,  
143 we looked at the relationship between an animal’s fraction of units exhibiting a delta oscillation  
144 and its level of dopamine neuron loss (as measured by striatal tyrosine-hydroxylase (TH)  
145 immunoreactivity). Performing a linear regression to predict %TH remaining from oscillation  
146 fraction showed a relatively strong ( $r^2 = 0.5267$ ) and significant ( $p < 0.01$  from a bootstrapped  
147 99% confidence interval, see Methods) relationship between dopamine loss and the fraction of  
148 oscillating units (Figure 4a).

149 Since striatal TH immunoreactivity is not a perfect indicator of parkinsonian symptoms,  
150 we also used these measures to predict motor behavior. Prior to *in vivo* recordings, these  
151 animals were given a series of behavioral tests to measure their mobility, dexterity, and strength  
152 (see Methods & Willard et al., 2019), and we performed principal component analysis on the  
153 results of these tests to get a single measure – the first principal component (PC1) – of their  
154 motor deficits. A linear regression predicting PC1 from the fraction of oscillating units illustrated  
155 a similarly strong and significant relationship (Figure 4b,  $r^2 = 0.6406$ ,  $p < 0.01$ ).

156 Besides oscillations, many other neural measures in the basal ganglia have been  
157 suggested as correlates of DD severity – most commonly, changes in firing rate, firing regularity,  
158 burstiness, and synchrony between units. To see how delta oscillations compare to these  
159 measures in reliably predicting DD severity, we built a set of statistical models to predict %TH in  
160 each animal from five physiological parameters measured from single units in the SNr: 1)  
161 median firing rate, 2) median coefficient of variation (CV) of interspike intervals (ISIs), 3) median  
162 rate of bursts, as measured from the Poisson surprise test, 4) fraction of significantly  
163 synchronous pairs of units, and 5) fraction of units with significant 0.5–4 Hz oscillations. Due to  
164 the highly nonlinear relationship between the first four of these measures and DD severity  
165 (Willard et al., 2019), we performed a series of nonlinear regressions on this data by building  
166 1000 decision trees from randomly selected sets of 20 (out of 25) animals, excluding the  
167 remaining 5 animals as a testing set for each tree (Figure 4c). We estimated a 95% confidence  
168 interval of mean squared errors (MSE's) from these 1000 trees and showed that a tree built  
169 from these parameters predicts TH significantly better than a naive intercept-only model (Figure  
170 4d).

171 To determine how each parameter informs the model, we shuffled the testing data for  
172 that parameter and calculated how much this loss of information increased the MSE of the  
173 model (the ‘importance’ of that parameter). We then estimated 95% confidence intervals for the  
174 importance of each parameter (see Methods). The fraction of oscillating units was the only  
175 parameter whose confidence interval did not extend below zero (Figure 4e), suggesting that,  
176 when the model is built to include oscillations, they are the only parameter that provides reliably  
177 predictive information. In other words, while other parameters may provide information, that  
178 information is redundant when the fraction of oscillating units is known.

179 To confirm this in another manner, we rebuilt the models using the same cross-validated  
180 training and testing sets as above using only a single parameter at a time, or using all of the  
181 parameters except oscillations. The first four parameters fall outside (FR) or on the edge (CV



182 ISI, Burst and Sync) of the full model confidence interval, but the model with all four parameters  
183 performs better than any individual parameter (Figure 4d), confirming results seen previously  
184 (Willard et al., 2019). However, the model built using only oscillations as a predictor is, on  
185 average, better than any other model including the combined parameter model, providing further  
186 evidence that other physiological parameters are not additionally informative when oscillations  
187 are considered.

188         Using the same procedure as above to predict PC1 of the animals' behavior, we found  
189 very similar results to those predicting TH levels – namely, firing rate, irregularity, burstiness and  
190 synchrony provide some information in predicting behavior, particularly when considered  
191 together. However, when the fraction of oscillatory units is included in the model, it is the only  
192 important variable, and is significantly so, in predicting motor dysfunction (Figure 4f–g).

193

#### 194 **Delta oscillations arise immediately following loss of MFB transmission or D2 receptor** 195 **activation**

196         The mechanism behind the observed delta oscillations is unclear, but they could arise  
197 due to a wide range of immediate biophysical changes in the basal ganglia after DD or emerge  
198 more slowly through plasticity or compensation. To determine this time course, we recorded  
199 from the SNr of healthy animals while acutely infusing lidocaine (a voltage-gated Na<sup>+</sup> channel  
200 blocker) into the medial forebrain bundle (MFB), the same injection site for 6-OHDA in our other  
201 experiments, to quickly disrupt MFB transmission. We found that oscillations arose in the SNr  
202 within 2 minutes of the start of lidocaine infusion (before infusion ended) and waned within ten  
203 minutes after the end of infusion, mirroring the time course of akinesia observed during the  
204 experiment (Figure 5a-c). This result is consistent with the similarly rapid onset of slow  
205 oscillations produced by TTX infusion to the MFB under anesthesia (Galati et al., 2010) and  
206 demonstrates that low frequency oscillations arise in the SNr almost immediately after loss of  
207 MFB transmission, ruling out long-term mechanisms for their generation.

208 To determine whether the loss of dopamine signaling is causal to the onset of delta  
209 oscillations, we recorded from the SNr of healthy animals before and during the systemic  
210 injection of a D1-receptor (D1R) antagonist (SCH233890) or a D2-receptor (D2R) antagonist  
211 (raclopride). While both drugs caused reduced movement on the wheel, only the D2R  
212 antagonist led to the development of oscillations in the SNr (Figure 5d–f). We then performed  
213 the converse experiment, injecting a D1R agonist (SKF81297) or D2R agonist (quinpirole)  
214 systemically into bilateral DD animals. Similarly, while both led to highly increased motor activity  
215 (though highly dyskinetic in the case of D1 agonism), only the D2R agonist injection attenuated  
216 delta oscillations in the SNr (Figure 5g–i). This suggests that low frequency oscillations are  
217 mediated purely due to a loss of action on D2Rs and are not affected by D1Rs.

218

### 219 **Delta oscillations are a feature of dopamine depletion throughout the indirect pathway**

220 Since the indirect pathway of the basal ganglia is a primary location of D2R-expressing  
221 neurons, we posited that oscillations may also be present elsewhere in the indirect pathway. We  
222 thus recorded from healthy and dopamine depleted globus pallidus externa (GPe) (Figure 6a)  
223 and subthalamic nucleus (STN) (Figure 6c), two reciprocally connected nuclei in the indirect  
224 pathway that both project heavily to SNr. We found a similar pattern of oscillatory activity across  
225 units in the GPe (40–80% of units in each animal, Figure 6b) and STN (15–70% of units in each  
226 animal, Figure 6d) after dopamine depletion, whereas only 1 of 111 total GPe and 1 of 63 STN  
227 units exhibited oscillations in the healthy state.

228

### 229 **Two populations of delta oscillating units in SNr both lead oscillations in motor cortex**

230 Previous literature suggests that oscillations in the dopamine depleted basal ganglia  
231 arise due to input from oscillating neurons in motor cortex (M1) under anesthesia (Tseng,  
232 Kasanetz, Kargieman, Riquelme, et al., 2001). However, since we have shown that these  
233 oscillations arise from antagonism on D2R's, a receptor more prevalent in the basal ganglia

234 than M1, a possible alternative in awake animals is that these oscillations arise first in the basal  
235 ganglia and then entrain M1.

236 To distinguish between these possibilities, we sought to characterize oscillations in the  
237 M1 of DD animals and determine the phase lag between M1 and SNr oscillations. We recorded  
238 an electrocorticogram (ECoG) in M1 while simultaneously recording from single units in SNr  
239 (Figure 7a). Compared to healthy controls, the M1 ECoG of DD animals exhibited a large  
240 increase in delta oscillations and reduction in theta (4–7 Hz) oscillations, which are typically  
241 seen in the cortex of healthy mice (Tort et al., 2018) (Figure 7b–c).

242 Determining the relationship between two oscillating signals from their phases is a  
243 difficult task – if the phase of one perfect oscillator slightly leads that of a second perfect  
244 oscillator, it is impossible to distinguish whether the first leads the second at a short lag or if the  
245 second leads the first at a long lag. However, neural oscillations do not match the activity  
246 patterns of perfect oscillators, but in fact have profiles that vary across periods and highly  
247 varying period lengths that are merely centered on a range of values. We can leverage this fact  
248 to make predictions about the relative timing of SNr and M1 (Figure 7d).

249 To quantify this relation, we performed a series of Granger causality regressions, which  
250 make no assumptions on the periodicity of the signals. Rather, they simply attempt to predict  
251 changes in M1 ECoG based on its own history (the null, autoregressive model) or by  
252 additionally including SNr spiking information from a single unit. For each unit, we computed  
253 201 separate models predicting M1, each using SNr spiking information at a different lag  
254 between -1 (i.e., past spikes) and +1 seconds (i.e., future spikes). Aligning the lag coefficients of  
255 the models for a single unit illustrates a periodicity in their values that matches the oscillation  
256 period (Figure 7e-f).

257 We computed the mean squared error (MSE) of each model at each lag and considered  
258 the lag that minimized MSE. To quantify whether this model significantly outperforms the purely  
259 autoregressive ECoG model, we performed an F test on the two models, correcting for multiple

260 lag comparisons (Figure 7e-f). We find that 51 of 63 of oscillating units in SNr predicted changes  
261 in the ECoG significantly better than the null autoregressive model, suggesting that there is  
262 significant correlation between SNr and M1 at a consistent time lag.

263         When analyzing the regression coefficients at these significant lags, we found a clear  
264 bimodal distribution of units determined by whether the active or inactive phase of their spike  
265 oscillation predicted positive deflections in M1. We term these types “active-predicting” (AP)  
266 units, which make up approximately 47.1% of ECoG-locked units (38.1% of oscillating units,  
267 34.3% of all analyzed units) and “inactive-predicting” (IP) units (Figure 7g), which make up the  
268 remaining 52.9% of ECoG-locked units (42.9% of oscillating units, 38.6% of all analyzed units).  
269 We see further evidence of these two distinct populations through cross correlation analysis of  
270 SNr unit pairs (Supplementary Figure 2).

271         When clustering units based on their phase lag relative to M1, SNr units also organize  
272 into a bimodal distribution, with one mode dominated by AP units and the other by IP units.  
273 (Figure 7h). Critically, all significant lags were negative – that is, SNr spikes from both  
274 populations of SNr units consistently predicted future changes in the ECoG, but not the inverse  
275 (Figure 7h). The relative timings of these signals suggest an order in which oscillations  
276 propagate through the SNr and cortex - AP neurons enter their active phase (increase firing),  
277 then IP neurons enter their inactive phase (decrease firing or pause), and finally M1 enters its  
278 active phase. These results suggest a consistent timeline of oscillatory dynamics by which two  
279 oscillating populations in SNr both dynamically predict M1 activity.

280

### 281 **M1 is not required for delta oscillations in SNr**

282         The results of our regression analysis suggest that oscillations in SNr are not caused by  
283 M1, but rather that oscillations in the SNr precede and predict those in M1. To test this  
284 hypothesis, we performed M1 aspiration lesions in dopamine depleted mice (Figure 8a) and  
285 recorded from the SNr. SNr units in the DD + M1-lesioned mice had similar oscillations to those

286 DD mice without M1 lesions (Figure 8b). These mice had a significantly higher fraction of  
287 oscillating units than control animals, but there was no difference between dopamine depleted  
288 animals with or without an M1 lesion (Figure 8c). These results provide additional evidence that  
289 M1 is a recipient, not the source, of delta oscillations in DD.

290

## 291 **Discussion**

292 In this paper, we have demonstrated that delta (0.5–4 Hz), not beta (7–35 Hz),  
293 oscillations are the predominant oscillatory feature in basal ganglia neurons in awake, dopamine  
294 depleted mice, and that the fraction of units exhibiting these oscillations is a good marker of  
295 dopamine loss and motor deficits. These results are consistent with data from the human PD  
296 literature demonstrating that delta oscillations are the dominant or only oscillatory feature in  
297 some PD patients (Du et al., 2018; Levy et al., 2002). We further show that these oscillations  
298 arise from a loss of action on D2 receptors and that, contrary to conclusions drawn from  
299 anesthetized experiments, motor cortex is not required for their generation but rather follows the  
300 oscillations evident in the basal ganglia.

### 301 **A novel method to distinguish oscillations from noise**

302 Although several studies demonstrate the presence of delta oscillations in the LFP (Levy  
303 et al., 2002; Priori et al., 2004) and single units (Steigerwald et al., 2008; Du et al., 2018;  
304 Zhuang et al., 2019) of PD patients, many more studies ignore oscillations in this band  
305 completely. Difficulties in detecting these oscillations may contribute to this lack of attention.  
306 Most studies examining oscillations in PD patients investigate the LFP, not individual spiking  
307 units, and the intrinsic low frequency noise of LFP signals makes reliably detecting oscillations  
308 in the delta range difficult. Even when it is possible to record from single units, we have  
309 demonstrated that low frequency noise can disrupt these spiking signals as well.

310 To reliably detect low frequency spike oscillations in awake animals, we have introduced  
311 phase shift as a novel detection technique which utilizes phase information typically discarded

312 from the Fourier transform. Phase shift measures the local stationarity of a signal composed  
313 primarily of one frequency – a perfect sine wave would have zero phase shift and high power,  
314 but a sine wave with a phase that randomly advances would have high phase shift while  
315 maintaining high power. This measure can distinguish our signal of interest – a single oscillatory  
316 signal that shifts in phase only gradually or rarely – from low frequency pink noise, a  
317 phenomenon that is not restricted to a single frequency, for which phase components measured  
318 at individual frequencies may shift rapidly between adjacent windows.

### 319 **Relationship to previous studies on PD oscillations**

320 In PD research, much of the oscillation literature has focused on the beta band  
321 (Hammond et al., 2007; Jenkinson & Brown, 2011). Here, we demonstrate dopamine loss and  
322 PD-like symptoms in mice without the presence of beta oscillations, and we have previously  
323 demonstrated their absence in LFP signals in awake mice as well (Willard et al., 2019). Indeed,  
324 to our knowledge, no study has demonstrated the presence of beta oscillations in mouse  
325 models of PD. Instead, this study suggests that delta oscillations are an important signal in the  
326 dopamine depleted basal ganglia and may cause parkinsonian dysfunction instead of or (in  
327 patients or other animal models) alongside beta oscillations.

328 The low frequency oscillations that we observe resemble those seen in anesthetized  
329 mice and rats, although oscillations in awake settings are generally noisier. By performing these  
330 experiments in awake mice, this study rules out concerns that oscillations in the basal ganglia  
331 are simply entrained by anesthesia-induced oscillations from cortex (Tseng, Kasanetz,  
332 Kargieman, Riquelme, et al., 2001; Belluscio et al., 2003) or by artificial respiration devices  
333 (Ruskin et al., 2002). Instead, we see that oscillations in the basal ganglia arise even during  
334 wakefulness and in fact lead and predict oscillations in M1. While we can rule out one causal  
335 direction (M1 → SNr), it is difficult to know whether SNr entrains M1 directly or if both SNr and  
336 M1 are entrained by a common source.

337 By referencing SNr oscillations to M1, we distinguish two populations of oscillating SNr  
338 neurons. These populations and how they are defined mimic the Type-A (TA) and Type-I (TI)  
339 populations observed in GPe whose discharge is high and low, respectively, during the active  
340 phase of M1 oscillations (Mallet et al., 2008). Active-predicting (AP) and inactive-predicting (IP)  
341 SNr neurons are a very close analog to TA and TI GPe neurons, respectively, except for two  
342 differences. First, the granularity of our regression analysis illustrates that AP and IP neurons  
343 are not simply active or inactive during the active phase of the M1 oscillation, but begin  
344 discharging (AP) or pausing (IP) 150–250 ms before the active component of the M1 oscillation.  
345 To our knowledge, a precise timing analysis of TA and TI neurons with M1 oscillations has not  
346 been performed to determine if a similar phenomenon occurs in GPe. Second, SNr AP and IP  
347 neurons are approximately equal in number, whereas TI neurons are the prevailing population  
348 in GPe (72% TI, 17% TA) (Mallet et al., 2008). These populations of GPe neurons were later  
349 shown to have anatomical (Corbit et al., 2016; Mallet et al., 2012), genetic (Abdi et al., 2015),  
350 and functional (Gage et al., 2010; Mallet et al., 2016) differences, forming the prototypic (TI) and  
351 arypallidal (TA) populations. AP and IP neurons may exhibit such differences as well, although  
352 these analyses would be beyond the scope of our study.

### 353 **Mechanisms of generation: insight from D2 receptors**

354 A previous study demonstrated that delta oscillations in anesthetized mice arise  
355 immediately after loss of dopamine signaling through the MFB (Galati et al., 2010), a finding that  
356 we have replicated here in awake mice. This fast onset (<2 minutes) contrasts with the typical  
357 longer timescale associated with beta oscillations in DD (Mallet et al., 2008). We further show  
358 that these oscillations arise due to a loss of D2R activation and can be ablated in already  
359 dopamine depleted animals through D2R agonism. It is unclear where the D2 receptors  
360 responsible for this ablation are located, but the high density of D2R's in the striatum make it a  
361 strong candidate. Lack of D2R activation causes a wide array of biomolecular changes within  
362 D2R-expressing neurons, including the opening of NMDA (Higley & Sabatini, 2010; Wang et al.,



363 2012) and L-type calcium channels (Hernández-López et al., 2000), which have been shown to  
364 be involved in membrane potential and calcium oscillations, respectively, in other circuits  
365 (Guertin & Hounsgaard, 1998).

366 In addition to striatum, another candidate for the generation of delta oscillations in DD is  
367 the STN-GPe loop. While often associated with beta oscillations (Mallet et al., 2008; Nevado-  
368 Holgado et al., 2014; Pavlides et al., 2012; Wei et al., 2015), this loop was originally implicated  
369 in generating much lower frequency oscillations (0.8 – 1.8 Hz) in cultured neurons (Plenz &  
370 Kital, 1999), a phenomenon that has been demonstrated subsequently in computational models  
371 (Terman et al., 2002; Modolo et al., 2008). The slow rates associated with the dynamics of T-  
372 type calcium channels and of some after-hyperpolarization currents have been shown to  
373 contribute the generation of oscillations and could explain the low frequency of these oscillations  
374 as well (Devergnas et al., 2015).

### 375 **Relationship between oscillations and motor dysfunction**

376 Of those studies that examine low frequency oscillations in PD patients, many consider  
377 only their relationship to tremor, seeing both positive and zero correlation with EMG signals  
378 during tremor bouts (Hurtado et al., 1999; Du et al., 2018). No study, to our knowledge, has  
379 investigated low frequency oscillations in relationship to other PD symptoms. Here, we have  
380 established a strong relationship between delta oscillations, dopamine loss, and akinetic  
381 dysfunction in mice. Further research and re-examination of existing patient data could elucidate  
382 a role for delta oscillations in predicting or causing PD motor deficits in humans.

383 While we cannot demonstrate a causal link between oscillations and motor dysfunction  
384 in this study, it is notable that the emergence of delta oscillations in the SNr from multiple  
385 experimental manipulations is consistently paired with a time-locked and commensurate  
386 reduction in motor activity. These results suggest a reappraisal of delta oscillations as a  
387 potential cause or marker of motor dysfunction in Parkinson's disease patients that could be an  
388 underappreciated target for PD therapies.



389 **Methods**

390 ***Animals***

391 All experiments were conducted in accordance with guidelines from the National  
392 Institutes of Health and with approval from the Carnegie Mellon University Institutional Animal  
393 Care and Use Committee. Male and female mice on a C57BL/6J background aged 8-15 weeks  
394 were randomly allocated into experimental groups (e.g. Control, Bilateral 6OHDA, Reserpine,  
395 etc.), except insofar as to ensure that male and female mice were both represented in every  
396 group.

397

398 ***Stereotaxic surgery***

399 ***Headbar implantation***

400 Animals were anesthetized with 20 mg/kg ketamine and 6mg/kg xylazine and placed in a  
401 stereotaxic frame (Kopf Instruments). Anesthesia was maintained throughout surgery with 1.0-  
402 1.5% isoflurane. All coordinates were measured in mm with AP and ML measured from bregma  
403 and DV relative to the dural surface. The scalp was opened and bilateral craniotomies (for later  
404 probe insertion) approximately 1.5 x 1.5 mm in size were drilled over SNr (AP: -3.00, ML:  
405  $\pm 1.50$ ), GPe (AP 0.00, ML:  $\pm 2.12$ ), or STN (AP: -1.70, ML:  $\pm 1.52$ ). A custom-made copper or  
406 stainless steel headbar was affixed to the mouse's skull with dental cement (Lang Dental). A  
407 well of dental cement was then built around the exposed skull (see *in vivo recordings*) and filled  
408 with a silicon elastomer.

409 ***Dopamine depletion***

410 A hole was drilled on one (for unilateral) or both (for bilateral) hemispheres of the skull  
411 over the medial forebrain bundle (MFB, AP: -0.80, ML:  $\pm 1.10$ ). A unilateral infusion cannula  
412 (PlasticsOne) was slowly lowered into the brain 5mm below the dura. 1  $\mu$ L of 5  $\mu$ g/ $\mu$ L 6OHDA  
413 (Sigma-Aldrich) or 0.9% saline was injected over the course of 5 minutes with a GenieTouch  
414 Hamilton syringe pump (Kent Scientific). The infusion cannula was left in place for 5 minutes

415 post-injection before being slowly retracted. For animals undergoing bilateral depletion, this  
416 process was repeated on the opposite hemisphere.

#### 417 *Cannula implantation*

418 For experiments involving acute drug infusion into the MFB or gradual dopamine  
419 depletion with 6OHDA, a bilateral guide cannula (Plastics One) was implanted (same  
420 coordinates as dopamine depletion) using dental cement (Lang Dental) and a dummy cannula  
421 was placed in the guide. Before infusion, the dummy was replaced with an infusion cannula and  
422 attached to the same Hamilton syringe pump as above. Gradually depleted animals were  
423 infused with 1  $\mu$ L of 0.75  $\mu$ g/ $\mu$ L 6OHDA every 5 days (See Willard et al 2019 for full details).

#### 424 *ECoG connector implantation*

425 For experiments involving electrocorticogram (ECoG) recordings, a male gold connector  
426 (Ampityco Electronics) was soldered to a stainless steel wire, and the connector was gently  
427 lowered above left or right motor cortex (M1, AP: +1.40, ML:  $\pm$ 1.00) such that the wire touched  
428 the dural surface then secured in place with dental cement (Lang Dental).

#### 429 *Aspiration lesions*

430 For experiments involving M1 lesion, a craniotomy was drilled bilaterally over M1 (AP  
431 0.0-2.5, ML 1.0:2.5) and the dura was removed. Using a 20-gauge suction tube (Miltex)  
432 attached to a vacuum source, we aspirated cortex to a depth of 2.5 mm across the craniotomy  
433 and under portions of the remaining skull, periodically lightly rinsing the area with saline. We  
434 filled the lesioned space with triple antibiotic (bacitracin, neomycin, polymyxin) before sealing  
435 the craniotomy with a silicon elastomer (Smooth-On)

#### 436 *Post-operative care*

437 Upon completion of surgery, animals were injected subcutaneously with 0.5 mg/kg  
438 ketofen and placed inside their cage half on/half off a heating pad to recover. Dopamine  
439 depleted animals were supplied with trail mix and moistened food to maintain weight and

440 hydration, in addition to their usual food pellets and water bottles, and animals were tracked  
441 regularly to ensure proper health and weight.

442

### 443 ***Drugs***

444 In addition to the drugs used above during surgery, animals were given the following  
445 drugs (Sigma-Aldrich, except when specified) dissolved in 0.9% saline (except when specified).  
446 For reserpine depletions, animals were injected i.p. daily for three days with 5 mg/kg reserpine  
447 in 2% acetic acid (diluted in 0.9% saline). For recordings involving dopamine agonists and  
448 antagonists, animals were injected i.p. during recording with either 0.4 mg/kg SCH22390, 3  
449 mg/kg raclopride, 1 mg/kg SKF81297 (Tocris Biosciences), or 3 mg/kg quinpirole. Acute  
450 infusions into the MFB used 2% lidocaine.

451

### 452 ***In vivo recordings***

453 Mice were head-fixed atop a free-running wheel (Heiney et al., 2014). After acclimation  
454 to head-fixation for ten minutes, the silicon elastomer was removed and craniotomies were  
455 cleaned with saline. Using a micromanipulator (Sutter Instruments), a linear microelectrode  
456 probe with sixteen channels spaced 50  $\mu\text{m}$  apart (NeuroNexus) was lowered into the craniotomy  
457 at the coordinates listed above for SNr, GPe or STN. After the initial lowering, a ground wire  
458 was placed in saline in the dental cement well on the skull. Once the top of the nucleus (SNr, -  
459 4.0mm, GPe: -3.60mm, STN: -4.00mm from the top of the brain) was found and high firing rate  
460 units were observed, the probe was held stable for at least ten minutes prior to recording.  
461 Spiking (bandpass filtered for 150-8000 Hz, sampled at 40 kHz) and local field potential  
462 (bandpass filtered to 0.5-300 Hz, sampled at 1 kHz) recordings were collected through an  
463 OmniPlex amplifier (Plexon, Inc.) with common median virtual referencing. After recording for at  
464 least three minutes, the probe was lowered to explore the full dorsal-ventral extent of the  
465 nucleus. Simultaneous to these recordings, the mouse's walking speed on the wheel was

466 recorded using an optical mouse and fed to a TTL-pulser which was connected to the OmniPlex  
467 amplifier analog input. For ECoG recordings, the gold implant was connected to a headstage  
468 with a ground wire in saline on top of the skull. The headstage was connected to an amplifier (A-  
469 M Systems) with 1000x gain and 0.1–500 Hz bandpass filtering and this amplifier was  
470 connected to the OmniPlex amplifier analog input.

471

## 472 ***Histology***

473         After recording, animals were sacrificed and perfused with 4% paraformaldehyde (PFA).  
474 The brain was extracted from the skull and stored in PFA for 24 hours then moved to a 30%  
475 sucrose solution for at least 24 additional hours. Tissue was sectioned using a freezing  
476 microtome (Microm HM 430; Thermo Scientific) and primary antibody incubations were  
477 performed on these sections at room temperature for 24 hours. A tyrosine-hydroxylase (TH)  
478 antibody (rabbit anti-TH, 1:1000; Pel-Freez) was used to confirm successful dopamine depletion  
479 in 6OHDA-depleted animals; animals required at most 15% TH fluorescence compared to  
480 controls on both hemispheres (for bilateral 6OHDA injection) or the contralateral hemisphere  
481 (for unilateral 6OHDA injection) to be considered for analysis. and an Iba1 antibody (rabbit anti-  
482 Iba1) for microglia activation was used to confirm probe location and guide cannula placement  
483 in animals undergoing infusion during recording. Epifluorescent images were taken at 10x  
484 magnification (Keyence BZ-X) and outlines of nuclei of interest were overlaid on the images  
485 (from Paxinos Mouse Brain Atlas in Stereotaxic Coordinates, Second Edition).

486

## 487 ***Data pre-processing***

488         Spikes were manually sorted into single units using Offline Sorter (Plexon). For  
489 classification as a single unit, the following criteria were set: 1) principal component analysis of  
490 waveforms generated a cluster of spikes significantly distinct from other unit or noise clusters ( $p$   
491  $< .05$ ), 2) the J3-statistic was greater than 1, 3) the Davies-Bouldin statistic was less than 0.5,

492 and 4) fewer than 0.15% of ISI's were less than 2ms. In the case where a unit was lost during  
493 recording, it was only used in analysis for the time period when its spike cluster satisfied these  
494 criteria, and only if its cluster was present for at least three minutes. Data were then imported  
495 into MATLAB (MathWorks) in which all further analysis was performed using custom code  
496 except when specified.

497 Since units must fire quickly enough to exhibit an oscillation, only units with a firing rate  
498 greater than 5 Hz (over 95% of sorted units) were considered for analysis. As ECoG signals  
499 were occasionally corrupted for short time windows, generally due to muscle activity, we visually  
500 determined a noise threshold for each recording and zeroed any length of signal within 250  
501 milliseconds of any data point whose absolute value exceeded that threshold. ECoG signals  
502 were then delta (0.5–4 Hz) bandpassed using a 2<sup>nd</sup> order Butterworth filter.

503

#### 504 ***Oscillation detection and visualization***

##### 505 *Renewal-Corrected Power Spectrum*

506 For each unit, we downsampled its spike train to 1 kHz and split it into segments of 2<sup>12</sup>  
507 ms, advancing from one segment to the next with time step size  $\Delta s = 2^9$  ms. For each  
508 segment, we calculated its interspike interval (ISI) probability distribution,  $P_0(t)$ . We calculated  
509  $\hat{C}_0(\omega)$ , the theoretical power spectral density (PSD) of a renewal process defined by  $P_0(t)$   
510 scaled by the number of spikes in the segment:

$$511 \quad \hat{C}_0(\omega) = Re \left( \frac{1 + \hat{P}_0(\omega)}{1 - \hat{P}_0(\omega)} \right) n$$

512 where  $Re(x)$  indicates the real part of  $x$ ,  $\hat{P}_0(\omega)$  indicates the Fourier transform of the ISI  
513 distribution in appropriate frequency units, and  $n$  is the number of spikes in the segment. This is  
514 a variant of a method presented previously for calculating  $\hat{C}_0(\omega)$  analytically rather than  
515 approximating it through Monte Carlo shuffling simulations (Rivlin-Etzion et al., 2006).

516 We next calculated an estimate of the PSD of the spike train in that segment:<sup>1</sup>

$$517 \hat{C}_{\infty}(\omega) = |FFT(x(t))|^2$$

518 where  $x(t)$  is the mean-subtracted spike train in the segment, FFT is the fast Fourier transform  
519 (MATLAB function *fft*) and vertical bars indicate absolute value. Finally, we normalized this  
520 estimate to achieve the renewal-corrected PSD of a single segment:

$$521 \hat{C}(\omega) = \frac{\hat{C}_{\infty}(\omega)}{\hat{C}_0(\omega)}$$

522 and averaged  $\hat{C}(\omega)$  values across segments to obtain the renewal-corrected PSD. All PSD's in  
523 this study have undergone this renewal-correction, but are simply referred to as PSD's for  
524 brevity.

### 525 *Phase Shift*

526 For the  $k$ th time segment, we calculated the uncorrected phase  $\tilde{\phi}$  at each frequency:

$$527 \tilde{\phi}(\omega, k) = \tan^{-1}(FFT(x(t)))$$

528 and made the following correction such that the phase of each frequency is defined relative to  
529 the start of the recording rather than the start of the segment:

$$530 \phi(\omega, k) = \text{mod}(\pi + (\tilde{\phi} - 2\pi\omega(k-1)\Delta s), 2\pi) - \pi$$

531 where mod is the modulus operator and  $\Delta s$  is the time step between adjacent segments (here,  
532  $2^9/1000$  seconds). In other words, for each frequency, imagine a perfect oscillator with zero  
533 phase at the start of the recording. For each segment, we determined what phase this oscillator  
534 would reach at the start of the segment and defined that phase to be zero for that segment. This  
535 correction ensures that a perfect oscillator would have the same corrected phase  $\phi$  for every  
536 segment.

---

<sup>1</sup> Note that a rectangular window is used throughout this section. This is because 1) compared to tapered windows, the rectangular window's maximal frequency resolution ensures a peak in the PSD representing an oscillation of interest will not mix with nearby peaks caused by pink noise, and 2) multiplication with a window function manifests as a convolution in the frequency domain, which distorts phase and yields a nearly flat and uninformative phase shift plot.

537 After computing the corrected phase of all segments, we approximated the time  
538 derivative  $\phi_s(\omega, k)$  by computing the difference of phase across successive time steps and  
539 averaged over each difference to obtain the average absolute rate of phase shift:

$$540 \quad \xi(\omega) = \frac{1}{N-1} \sum_{s=1}^{N-1} |\phi_s(\omega, k+1) - \phi_s(\omega, k)|$$

541 where  $N$  is the number of segments. For brevity, we refer to  $\xi(\omega)$  as the phase shift.

542

### 543 *Oscillation Detection*

544 We detected oscillations in a two-step process by first seeking frequencies with high  
545 power and then determining whether these frequencies also had low phase shift.

546 To determine whether a unit reached statistically significantly high power at a particular  
547 frequency, we found each local maximum of  $\hat{C}(\omega)$ , defined as a value higher than its three  
548 neighbors on both sides, within the band 0.5–4 Hz (or 7–35 Hz for detecting beta oscillations).  
549 We then estimated a 99% confidence interval of renewal-corrected power from the region of  
550  $\hat{C}(\omega)$  between 100 and 500 Hz, correcting for multiple comparisons (Bonferroni correction) of all  
551 frequencies in the band of interest. A peak of  $\hat{C}(\omega)$  was considered significant if it fell above this  
552 confidence interval.

553 As our second step, we determined if any frequency detected in the previous step had a  
554 significantly low phase shift. We estimated a 95% confidence interval of phase shifts from the  
555 region of  $\xi(\omega)$  between 100 and 500 Hz, correcting for multiple comparisons (Bonferroni  
556 correction) if multiple frequencies were detected from the PSD. We concluded that an oscillation  
557 was present at a frequency with significant power if the phase shift at that frequency fell below  
558 this confidence interval.

559

### 560 *Spike Spectrograms*

561 For time frequency analyses, the process outlined under *Renewal-Corrected Power*  
562 *Spectrum* was modified to use segments of length  $2^{13}$  ms with  $2^{11}$  ms overlap to improve  
563 visualization. Rather than averaging over segments, the resultant matrix was smoothed with a  
564 3x3 2-D gaussian filter and plotted as a normalized heatmap (MATLAB function *imagesc*). Due  
565 to the loss of fine frequency resolution at low frequencies, this procedure was only used on  
566 spike trains in which an oscillation was detected in the previous procedure.

567

### 568 ***Neural Measures***

569 Beyond oscillations, we investigated several other neural measures – firing rate, firing  
570 variability, bursts and synchrony. A unit's firing rate was defined as its number of spikes divided  
571 by the total time of recording. Variability was measured as the coefficient of variation (standard  
572 deviation divided by mean) of a unit's interspike intervals. Bursts were quantified using the  
573 Poisson surprise algorithm (Legendy & Salcman, 1985) with a surprise threshold of 5, initial  
574 firing rate threshold of 200% of baseline calculated over the entire recording, and removal of  
575 any burst with fewer than 3 spikes.

576 To determine if two units were synchronous, we used the method and parameters  
577 outlined in Willard et al. 2019, which determines the fraction of synchronous spikes above  
578 chance after correcting for nonstationarity in a unit's firing rate (Willard et al., 2019). In brief, we  
579 windowed both spike trains into 12-second segments and zeroed the first and last four seconds  
580 of the segment taken from the second spike train. We performed cross-correlation with a  
581 maximum lag of four seconds. Since this maximum lag is equal to the length of time zeroed on  
582 the second spike train, this ensures a constant number of non-zero-padded comparisons ( $n_c$ ) at  
583 each lag, as opposed to traditional cross-correlation in which  $n_c$  is a function of lag. We divided  
584 the cross-correlogram for the segment by the mean value from 0.5–4 seconds on both sides,  
585 which allows the correlation's units to be interpreted as the fraction of spikes greater than  
586 chance at a given lag (where 1 = chance). We repeated this process on overlapping segments



587 (time step = 4 seconds) and then averaged these results together to get the mean,  
588 nonstationarity-corrected cross-correlogram. We generated a 99% confidence interval from the  
589 data with lag  $\geq 0.5$  s (which is a reasonable null distribution due to  $n_c$ , and thus the variance of  
590 the correlation estimate, being held constant). We conclude that a pair is synchronous if its  
591 normalized cross-correlation at lag zero is larger than the upper boundary of this confidence  
592 interval.

593

### 594 ***Behavioral Testing and Metric***

595 Full details on the behavioral testing and the principal component analysis (PCA) metric  
596 for gradually depleted animals can be found in Willard et al. 2019. In brief, PCA was performed  
597 on the following metrics from behavioral tests: mean speed in an open field, number of rears in  
598 10 minutes in a small enclosure, total time spent traversing a pole task, and latency to fall on a  
599 wire hang task.

600

### 601 ***Linear Regression***

602 Linear regression was performed using ordinary least squares. To determine if a linear fit  
603 was statistically significant, we computed 1000 fits each using a random subsample containing  
604 80% of the data. We computed a bootstrapped confidence interval of the slope of this linear  
605 relationship from the middle 99% of the slopes of these 1000 fits, and the relationship was  
606 considered significant if this interval did not include zero.

607

### 608 ***Decision Tree Regression***

609 We sought to determine the relationship between dopamine loss, motor symptoms and  
610 neural firing by predicting animals' TH immunofluorescence (see *Histology*) and the first  
611 principal component (PC1) of their behavior (see *Behavioral Testing and Metric*) from four  
612 physiological measures (see *Neural Measures*) and prevalence of delta oscillations. Firing rate,

613 CV and bursts/second were averaged across all neurons for each animal, synchrony was  
614 measured as the fraction of synchronous pairs of units, and oscillations were measured as the  
615 fraction of delta oscillating units. Because of the highly nonlinear nature of these parameters'  
616 relationships to dopamine loss and behavior (Willard et al., 2019), we used a variant of decision  
617 tree regression, a highly nonlinear regression method.

618 We built an individual tree on 80% of the data (20 animals) using the *fit* method of the  
619 DecisionTreeRegressor class in the scikit-learn package for Python to predict the percent of TH  
620 remaining (Y) from the above neuronal parameters (a set X). In brief, this method places all  
621 training data at the topmost node of a tree and calculates the mean squared error (MSE) of this  
622 node as if each animal's TH were estimated to be the mean TH of every animal at the node. We  
623 determined, for each parameter X, the threshold T that would most reduce the mean squared  
624 error (MSE) of the animals if they were to be estimated in two different sets depending on  
625 whether their value of X is "greater than" or "less than or equal to" T. We then found the  
626 parameter for which the best T most reduces that MSE and split the animals at that node into  
627 two new child nodes according to the identified threshold. We iteratively repeated this process  
628 at every node until all terminal nodes had two or fewer animals at them, at which point each  
629 terminal node is termed a "leaf" of the tree.

630 We tested the remaining 20% of the data (5 animals) using the DecisionTreeRegressor  
631 *test* method, which runs each animal through the tree (picking  $>$  or  $\leq$  at each node as  
632 determined by the animal's data) until it reaches a leaf. The mean value of Y at each leaf is the  
633 prediction for that animal. We computed the error of the tree as the root-mean-squared error  
634 (RMSE) of its 5 predictions.

635 We computed a forest of 1000 such trees through subsampling the data into training and  
636 testing sets (Monte Carlo cross-validation) and calculated the top and bottom 2.5 percentiles to  
637 approximate a 95% confidence interval for the forest. We generated an intercept-only forest  
638 (using no parameters in the training set) and oscillation-only forest (using only the fraction of

639 oscillations and an intercept term in the training set) on the same 1000 bootstrapped training  
640 and testing sets.

641         The importance of each parameter was determined using a variant on permutation  
642 importance. For a given parameter and tree, consider the set S of values for that parameter in  
643 the test set. We produced pseudo-test data with every derangement of S (i.e. 5 animals  $\times$  44  
644 derangements of 5 values = 220 pseudo-test animals with shuffled data for one parameter). The  
645 difference between the RMSE of the real test data and the pseudo-test data is the importance of  
646 that parameter for that tree. To determine the parameter importance for the entire forest, we  
647 approximate a 95% confidence intervals as above from the 1000 trees.

648         A forest predicting the first principal component (PC1) of behavior instead of % TH  
649 remaining was computed in the same manner.

650

### 651 ***ECoG-Spike Time Series Regression***

652         To determine if SNr neurons have a significant lead/lag relationship with M1, we built a  
653 series of regression models predicting an M1 ECoG signal from the spiking of a single SNr unit  
654 at various lags. First, we binned the ECoG into 10ms bins and defined the dependent variable Y  
655 as the difference between adjacent ECoG measurements to reduce nonstationarity. We then  
656 built a 10th order autoregressive model of Y which served as the null model.

657         To incorporate SNr firing into the prediction, we calculated the spike density function  
658 (SDF) for an SNr unit by convolving its spike train with a Gaussian function with a standard  
659 deviation of 100 ms. We then aimed to determine which time shift of the SDF best improves the  
660 prediction of the ECoG. One might use a distributed lag model for this task, where the  
661 explanatory variables consist of the time shifted ECoG (autoregression) and all considered time  
662 shifts of the SNr SDF simultaneously in a single model, but the multicollinearity of the SDF at  
663 different time shifts can heavily bias the regression coefficients. Instead we assumed that, if a  
664 lag exists by which the unit firing influences the ECoG or vice versa, then there is only one such

665 lag by which this influence occurs. Thus, we could build an individual model for each time shift  
666 of the SDF. Each model used the 10<sup>th</sup> order autoregressive terms and one SDF term shifted  
667 from between -100 and +100 bins (-1000 to +1000 ms) as its explanatory variables. We built  
668 201 such models, which covers the entire range of lags at 1 bin increments.

669 To determine if a significant lead/lag existed, we found the best model as determined by  
670 its mean squared error (MSE). We then determined if the model at this lag was significantly  
671 better than the null autoregressive model by performing an F-test at  $\alpha < 0.05$ , correcting for 201  
672 comparisons (Bonferroni correction). As choosing ECoG as the independent variable and using  
673 autoregressive terms from the past could introduce bias in favor of SNr predicting M1, we also  
674 performed these analyses using SNr as the independent variable (i.e. computing a null  
675 autoregressive model for SNr spiking and then computing 201 models at distinct ECoG time  
676 shifts to compare to the null), and performed the same analysis as above but in backwards time  
677 (i.e. building an autoregressive model of the ECoG from future ECoG samples). These analyses  
678 gave very similar results to the original analysis but were omitted for brevity.

679

### 680 ***Statistical Tests***

681 Statistical tests were performed to establish if fractions of oscillatory units and fractional  
682 ECoG bandpowers were significantly different across conditions. For comparisons with two  
683 groups, a two-sample t-test was performed, unless data were paired before and after a  
684 manipulation (e.g. acute drug infusion), in which case a one-sample t-test was performed. For  
685 comparisons with multiple groups compared against a control group, a one-way ANOVA was  
686 performed, and if this reached significance at the  $\alpha = 0.05$  level, a Dunnett's post-hoc test was  
687 performed to determine if there were individual differences comparing groups to control.

688 Asterisks above comparisons in figures correspond to \*:  $p < 0.05$ , \*\*:  $p < 0.01$ , \*\*\*  $p < 0.0001$ .

689

690

691 **Acknowledgements**

692 Thanks to Rachel Bouchard, Hyun Young Park, Jenna Schwenk, Christen Snyder and Robert S.  
693 Turner for their help with this project. This work was supported by NSF awards DMS 1516288  
694 (AHG, JER), 1724240 (JER), and NIH awards R01NS101016, R01NS104835, and  
695 R21NS095103 (AHG), and F31NS101821 (TCW)

696

697 **Competing Interests**

698 No competing interests to declare.

699 **References**

- 700 Abdi, A., Mallet, N., Mohamed, F. Y., Sharott, A., Dodson, P. D., Nakamura, K. C., Suri, S., Avery, S. V.,  
701 Larvin, J. T., Garas, F. N., Garas, S. N., Vinciati, F., Morin, S., Bezard, E., Baufreton, J., & Magill, P.  
702 J. (2015). Prototypic and Arkypallidal Neurons in the Dopamine-Intact External Globus Pallidus.  
703 *Journal of Neuroscience*, 35(17), 6667–6688. <https://doi.org/10.1523/JNEUROSCI.4662-14.2015>
- 704 Aristieta, A., Ruiz-Ortega, J. A., Miguelez, C., Morera-Herreras, T., & Ugedo, L. (2016). Chronic L-DOPA  
705 administration increases the firing rate but does not reverse enhanced slow frequency  
706 oscillatory activity and synchronization in substantia nigra pars reticulata neurons from 6-  
707 hydroxydopamine-lesioned rats. *Neurobiology of Disease*, 89(Supplement C), 88–100.  
708 <https://doi.org/10.1016/j.nbd.2016.02.003>
- 709 Belluscio, M. A., Kasanetz, F., Riquelme, L. A., & Murer, M. G. (2003). Spreading of slow cortical rhythms  
710 to the basal ganglia output nuclei in rats with nigrostriatal lesions. *European Journal of*  
711 *Neuroscience*, 17(5), 1046–1052. <https://doi.org/10.1046/j.1460-9568.2003.02543.x>
- 712 Bergman, H., Wichmann, T., Karmon, B., & DeLong, M. R. (1994). Parkinsonian Tremor is Associated with  
713 Low Frequency Neuronal Oscillations in Selective Loops of the Basal Ganglia. In G. Percheron, J.  
714 S. McKenzie, & J. Féger (Eds.), *The Basal Ganglia IV: New Ideas and Data on Structure and*  
715 *Function* (pp. 317–325). Springer US. [https://doi.org/10.1007/978-1-4613-0485-2\\_33](https://doi.org/10.1007/978-1-4613-0485-2_33)
- 716 Connolly, A. T., Jensen, A. L., Bello, E. M., Netoff, T. I., Baker, K. B., Johnson, M. D., & Vitek, J. L. (2015).  
717 Modulations in Oscillatory Frequency and Coupling in Globus Pallidus with Increasing  
718 Parkinsonian Severity. *Journal of Neuroscience*, 35(15), 6231–6240.  
719 <https://doi.org/10.1523/JNEUROSCI.4137-14.2015>
- 720 Corbit, V. L., Whalen, T. C., Zitelli, K. T., Crilly, S. Y., Rubin, J. E., & Gittis, A. H. (2016). Pallidostriatal  
721 Projections Promote  $\beta$  Oscillations in a Dopamine-Depleted Biophysical Network Model. *Journal*  
722 *of Neuroscience*, 36(20), 5556–5571. <https://doi.org/10.1523/JNEUROSCI.0339-16.2016>

- 723 Devergnas, A., Chen, E., Ma, Y., Hamada, I., Pittard, D., Kammermeier, S., Mullin, A. P., Faundez, V.,  
724 Lindsley, C. W., Jones, C., Smith, Y., & Wichmann, T. (2015). Anatomical localization of Cav3.1  
725 calcium channels and electrophysiological effects of T-type calcium channel blockade in the  
726 motor thalamus of MPTP-treated monkeys. *Journal of Neurophysiology*, *115*(1), 470–485.  
727 <https://doi.org/10.1152/jn.00858.2015>
- 728 Du, G., Zhuang, P., Hallett, M., Zhang, Y.-Q., Li, J.-Y., & Li, Y.-J. (2018). Properties of oscillatory neuronal  
729 activity in the basal ganglia and thalamus in patients with Parkinson’s disease. *Translational*  
730 *Neurodegeneration*, *7*(1), 17. <https://doi.org/10.1186/s40035-018-0123-y>
- 731 Foffani, G., Ardolino, G., Egidi, M., Caputo, E., Bossi, B., & Priori, A. (2006). Subthalamic oscillatory  
732 activities at beta or higher frequency do not change after high-frequency DBS in Parkinson’s  
733 disease. *Brain Research Bulletin*, *69*(2), 123–130.  
734 <https://doi.org/10.1016/j.brainresbull.2005.11.012>
- 735 Gage, G. J., Stoetzner, C. R., Wiltschko, A. B., & Berke, J. D. (2010). Selective Activation of Striatal Fast-  
736 Spiking Interneurons during Choice Execution. *Neuron*, *67*(3), 466–479.  
737 <https://doi.org/10.1016/j.neuron.2010.06.034>
- 738 Galati, S., D’Angelo, V., Olivola, E., Marzetti, F., Di Giovanni, G., Stanzione, P., & Stefani, A. (2010). Acute  
739 inactivation of the medial forebrain bundle imposes oscillations in the SNr: A challenge for the 6-  
740 OHDA model? *Experimental Neurology*, *225*(2), 294–301.  
741 <https://doi.org/10.1016/j.expneurol.2010.06.020>
- 742 Guertin, P. A., & Hounsgaard, J. (1998). NMDA-Induced Intrinsic Voltage Oscillations Depend on L-Type  
743 Calcium Channels in Spinal Motoneurons of Adult Turtles. *Journal of Neurophysiology*, *80*(6),  
744 3380–3382. <https://doi.org/10.1152/jn.1998.80.6.3380>

- 745 Halje, P., Brys, I., Mariman, J. J., da Cunha, C., Fuentes, R., & Petersson, P. (2019). Oscillations in cortico-  
746 basal ganglia circuits: Implications for Parkinson's disease and other neurologic and psychiatric  
747 conditions. *Journal of Neurophysiology*, *122*(1), 203–231. <https://doi.org/10.1152/jn.00590.2018>
- 748 Hammond, C., Bergman, H., & Brown, P. (2007). Pathological synchronization in Parkinson's disease:  
749 Networks, models and treatments. *Trends in Neurosciences*, *30*(7), 357–364.  
750 <https://doi.org/10.1016/j.tins.2007.05.004>
- 751 Heimer, G., Rivlin, M., Israel, Z., & Bergman, H. (2006). Synchronizing activity of basal ganglia and  
752 pathophysiology of Parkinson's disease. In P. Riederer, H. Reichmann, M. B. H. Youdim, & M.  
753 Gerlach (Eds.), *Parkinson's Disease and Related Disorders* (pp. 17–20). Springer.  
754 [https://doi.org/10.1007/978-3-211-45295-0\\_4](https://doi.org/10.1007/978-3-211-45295-0_4)
- 755 Heiney, S. A., Wohl, M. P., Chettih, S. N., Ruffolo, L. I., & Medina, J. F. (2014). Cerebellar-Dependent  
756 Expression of Motor Learning during Eyeblink Conditioning in Head-Fixed Mice. *Journal of*  
757 *Neuroscience*, *34*(45), 14845–14853. <https://doi.org/10.1523/JNEUROSCI.2820-14.2014>
- 758 Hernández-López, S., Tkatch, T., Perez-Garci, E., Galarraga, E., Bargas, J., Hamm, H., & Surmeier, D. J.  
759 (2000). D2 Dopamine Receptors in Striatal Medium Spiny Neurons Reduce L-Type Ca<sup>2+</sup> Currents  
760 and Excitability via a Novel PLCβ1–IP3–Calcineurin–Signaling Cascade. *Journal of Neuroscience*,  
761 *20*(24), 8987–8995. <https://doi.org/10.1523/JNEUROSCI.20-24-08987.2000>
- 762 Higley, M. J., & Sabatini, B. L. (2010). Competitive regulation of synaptic Ca<sup>2+</sup> influx by D2 dopamine  
763 and A2A adenosine receptors. *Nature Neuroscience*, *13*(8), 958–966.  
764 <https://doi.org/10.1038/nn.2592>
- 765 Hurtado, J. M., Gray, C. M., Tamas, L. B., & Sigvardt, K. A. (1999). Dynamics of tremor-related oscillations  
766 in the human globus pallidus: A single case study. *Proceedings of the National Academy of*  
767 *Sciences*, *96*(4), 1674–1679. <https://doi.org/10.1073/pnas.96.4.1674>



- 768 Jenkinson, N., & Brown, P. (2011). New insights into the relationship between dopamine, beta  
769 oscillations and motor function. *Trends in Neurosciences*, *34*(12), 611–618.  
770 <https://doi.org/10.1016/j.tins.2011.09.003>
- 771 Kühn, A. A., Kempf, F., Brücke, C., Doyle, L. G., Martinez-Torres, I., Pogosyan, A., Trottenberg, T., Kupsch,  
772 A., Schneider, G.-H., Hariz, M. I., Vandenberghe, W., Nuttin, B., & Brown, P. (2008). High-  
773 Frequency Stimulation of the Subthalamic Nucleus Suppresses Oscillatory  $\beta$  Activity in Patients  
774 with Parkinson’s Disease in Parallel with Improvement in Motor Performance. *Journal of*  
775 *Neuroscience*, *28*(24), 6165–6173. <https://doi.org/10.1523/JNEUROSCI.0282-08.2008>
- 776 Kühn, A. A., Kupsch, A., Schneider, G.-H., & Brown, P. (2006). Reduction in subthalamic 8–35 Hz  
777 oscillatory activity correlates with clinical improvement in Parkinson’s disease. *European Journal*  
778 *of Neuroscience*, *23*(7), 1956–1960. <https://doi.org/10.1111/j.1460-9568.2006.04717.x>
- 779 Legendy, C. R., & Salzman, M. (1985). Bursts and recurrences of bursts in the spike trains of  
780 spontaneously active striate cortex neurons. *Journal of Neurophysiology*, *53*(4), 926–939.  
781 <https://doi.org/10.1152/jn.1985.53.4.926>
- 782 Lenz, F. A., Tasker, R. R., Kwan, H. C., Schnider, S., Kwong, R., Murayama, Y., Dostrovsky, J. O., & Murphy,  
783 J. T. (1988). Single unit analysis of the human ventral thalamic nuclear group: Correlation of  
784 thalamic “tremor cells” with the 3-6 Hz component of parkinsonian tremor. *Journal of*  
785 *Neuroscience*, *8*(3), 754–764. <https://doi.org/10.1523/JNEUROSCI.08-03-00754.1988>
- 786 Levy, R., Ashby, P., Hutchison, W. D., Lang, A. E., Lozano, A. M., & Dostrovsky, J. O. (2002). Dependence  
787 of subthalamic nucleus oscillations on movement and dopamine in Parkinson’s disease. *Brain*,  
788 *125*(6), 1196–1209. <https://doi.org/10.1093/brain/awf128>
- 789 Magill, P. J., Bolam, J. P., & Bevan, M. D. (2001). Dopamine regulates the impact of the cerebral cortex  
790 on the subthalamic nucleus–globus pallidus network. *Neuroscience*, *106*(2), 313–330.  
791 [https://doi.org/10.1016/S0306-4522\(01\)00281-0](https://doi.org/10.1016/S0306-4522(01)00281-0)

- 792 Mallet, N., Micklem, B. R., Henny, P., Brown, M. T., Williams, C., Bolam, J. P., Nakamura, K. C., & Magill,  
793 P. J. (2012). Dichotomous Organization of the External Globus Pallidus. *Neuron*, *74*(6), 1075–  
794 1086. <https://doi.org/10.1016/j.neuron.2012.04.027>
- 795 Mallet, N., Pogosyan, A., Márton, L. F., Bolam, J. P., Brown, P., & Magill, P. J. (2008). Parkinsonian Beta  
796 Oscillations in the External Globus Pallidus and Their Relationship with Subthalamic Nucleus  
797 Activity. *Journal of Neuroscience*, *28*(52), 14245–14258.  
798 <https://doi.org/10.1523/JNEUROSCI.4199-08.2008>
- 799 Mallet, N., Schmidt, R., Leventhal, D., Chen, F., Amer, N., Boraud, T., & Berke, J. D. (2016). Arkypallidal  
800 Cells Send a Stop Signal to Striatum. *Neuron*, *89*(2), 308–316.  
801 <https://doi.org/10.1016/j.neuron.2015.12.017>
- 802 McCairn, K. W., & Turner, R. S. (2009). Deep Brain Stimulation of the Globus Pallidus Internus in the  
803 Parkinsonian Primate: Local Entrainment and Suppression of Low-Frequency Oscillations.  
804 *Journal of Neurophysiology*, *101*(4), 1941–1960. <https://doi.org/10.1152/jn.91092.2008>
- 805 McConnell, G. C., So, R. Q., Hilliard, J. D., Lopomo, P., & Grill, W. M. (2012). Effective Deep Brain  
806 Stimulation Suppresses Low-Frequency Network Oscillations in the Basal Ganglia by Regularizing  
807 Neural Firing Patterns. *Journal of Neuroscience*, *32*(45), 15657–15668.  
808 <https://doi.org/10.1523/JNEUROSCI.2824-12.2012>
- 809 Modolo, J., Henry, J., & Beuter, A. (2008). Dynamics of the Subthalamo-pallidal Complex in Parkinson's  
810 Disease During Deep Brain Stimulation. *Journal of Biological Physics*, *34*(3–4), 251–266.  
811 <https://doi.org/10.1007/s10867-008-9095-y>
- 812 Muralidharan, A., Jensen, A. L., Connolly, A., Hendrix, C. M., Johnson, M. D., Baker, K. B., & Vitek, J. L.  
813 (2016). Physiological changes in the pallidum in a progressive model of Parkinson's disease: Are  
814 oscillations enough? *Experimental Neurology*, *279*(Supplement C), 187–196.  
815 <https://doi.org/10.1016/j.expneurol.2016.03.002>

- 816 Nevado-Holgado, A. J., Mallet, N., Magill, P. J., & Bogacz, R. (2014). Effective connectivity of the  
817 subthalamic nucleus–globus pallidus network during Parkinsonian oscillations. *The Journal of*  
818 *Physiology*, 1429–1455. [https://doi.org/10.1113/jphysiol.2013.259721@10.1002/\(ISSN\)1469-](https://doi.org/10.1113/jphysiol.2013.259721@10.1002/(ISSN)1469-7793(CAT)VirtualIssues(VI)SfN2014)  
819 [7793\(CAT\)VirtualIssues\(VI\)SfN2014](https://doi.org/10.1113/jphysiol.2013.259721@10.1002/(ISSN)1469-7793(CAT)VirtualIssues(VI)SfN2014)
- 820 Parr-Brownlie, L. C., Poloskey, S. L., Bergstrom, D. A., & Walters, J. R. (2009). Parafascicular thalamic  
821 nucleus activity in a rat model of Parkinson’s disease. *Experimental Neurology*, 217(2), 269–281.  
822 <https://doi.org/10.1016/j.expneurol.2009.02.010>
- 823 Pavlides, A., Hogan, S. J., & Bogacz, R. (2012). Improved conditions for the generation of beta oscillations  
824 in the subthalamic nucleus–globus pallidus network. *European Journal of Neuroscience*, 36(2),  
825 2229–2239. <https://doi.org/10.1111/j.1460-9568.2012.08105.x>
- 826 Plenz, D., & Kital, S. T. (1999). A basal ganglia pacemaker formed by the subthalamic nucleus and  
827 external globus pallidus. *Nature*, 400(6745), 677–682. <https://doi.org/10.1038/23281>
- 828 Priori, A., Foffani, G., Pesenti, A., Tamma, F., Bianchi, A. M., Pellegrini, M., Locatelli, M., Moxon, K. A., &  
829 Villani, R. M. (2004). Rhythm-specific pharmacological modulation of subthalamic activity in  
830 Parkinson’s disease. *Experimental Neurology*, 189(2), 369–379.  
831 <https://doi.org/10.1016/j.expneurol.2004.06.001>
- 832 Ray, N. J., Jenkinson, N., Wang, S., Holland, P., Brittain, J. S., Joint, C., Stein, J. F., & Aziz, T. (2008). Local  
833 field potential beta activity in the subthalamic nucleus of patients with Parkinson’s disease is  
834 associated with improvements in bradykinesia after dopamine and deep brain stimulation.  
835 *Experimental Neurology*, 213(1), 108–113. <https://doi.org/10.1016/j.expneurol.2008.05.008>
- 836 Raz, A., Vaadia, E., & Bergman, H. (2000). Firing Patterns and Correlations of Spontaneous Discharge of  
837 Pallidal Neurons in the Normal and the Tremulous 1-Methyl-4-Phenyl-1,2,3,6-  
838 Tetrahydropyridine Vervet Model of Parkinsonism. *Journal of Neuroscience*, 20(22), 8559–8571.  
839 <https://doi.org/10.1523/JNEUROSCI.20-22-08559.2000>

- 840 Rivlin-Etzion, M., Ritov, Y., Heimer, G., Bergman, H., & Bar-Gad, I. (2006). Local Shuffling of Spike Trains  
841 Boosts the Accuracy of Spike Train Spectral Analysis. *Journal of Neurophysiology*, 95(5), 3245–  
842 3256. <https://doi.org/10.1152/jn.00055.2005>
- 843 Rossi, L., Marceglia, S., Foffani, G., Cogiamanian, F., Tamma, F., Rampini, P., Barbieri, S., Bracchi, F., &  
844 Priori, A. (2008). Subthalamic local field potential oscillations during ongoing deep brain  
845 stimulation in Parkinson's disease. *Brain Research Bulletin*, 76(5), 512–521.  
846 <https://doi.org/10.1016/j.brainresbull.2008.01.023>
- 847 Ruskin, D. N., Bergstrom, D. A., & Walters, J. R. (2002). Nigrostriatal Lesion and Dopamine Agonists  
848 Affect Firing Patterns of Rodent Entopeduncular Nucleus Neurons. *Journal of Neurophysiology*,  
849 88(1), 487–496. <https://doi.org/10.1152/jn.00844.2001>
- 850 Steigerwald, F., Pötter, M., Herzog, J., Pinsker, M., Kopper, F., Mehdorn, H., Deuschl, G., & Volkmann, J.  
851 (2008). Neuronal Activity of the Human Subthalamic Nucleus in the Parkinsonian and  
852 Nonparkinsonian State. *Journal of Neurophysiology*, 100(5), 2515–2524.  
853 <https://doi.org/10.1152/jn.90574.2008>
- 854 Swan, C. B., Schulte, D. J., Brocker, D. T., & Grill, W. M. (2019). Beta frequency oscillations in the  
855 subthalamic nucleus are not sufficient for the development of symptoms of parkinsonian  
856 bradykinesia/akinesia in rats. *ENeuro*, ENEURO.0089-19.2019.  
857 <https://doi.org/10.1523/ENeuro.0089-19.2019>
- 858 Terman, D., Rubin, J. E., Yew, A. C., & Wilson, C. J. (2002). Activity Patterns in a Model for the  
859 Subthalamopallidal Network of the Basal Ganglia. *Journal of Neuroscience*, 22(7), 2963–2976.
- 860 Tort, A. B. L., Ponsel, S., Jessberger, J., Yanovsky, Y., Brankač, J., & Draguhn, A. (2018). Parallel detection  
861 of theta and respiration-coupled oscillations throughout the mouse brain. *Scientific Reports*,  
862 8(1), 1–14. <https://doi.org/10.1038/s41598-018-24629-z>

- 863 Tseng, K. Y., Kasanetz, F., Kargieman, L., Pazo, J. H., Murer, M. G., & Riquelme, L. A. (2001). Subthalamic  
864 nucleus lesions reduce low frequency oscillatory firing of substantia nigra pars reticulata  
865 neurons in a rat model of Parkinson's disease. *Brain Research*, *904*(1), 93–103.  
866 [https://doi.org/10.1016/S0006-8993\(01\)02489-1](https://doi.org/10.1016/S0006-8993(01)02489-1)
- 867 Tseng, K. Y., Kasanetz, F., Kargieman, L., Riquelme, L. A., & Murer, M. G. (2001). Cortical Slow Oscillatory  
868 Activity Is Reflected in the Membrane Potential and Spike Trains of Striatal Neurons in Rats with  
869 Chronic Nigrostriatal Lesions. *Journal of Neuroscience*, *21*(16), 6430–6439.
- 870 Walters, J. R., Hu, D., Itoga, C. A., Parr-Brownlie, L. C., & Bergstrom, D. A. (2007). Phase relationships  
871 support a role for coordinated activity in the indirect pathway in organizing slow oscillations in  
872 basal ganglia output after loss of dopamine. *Neuroscience*, *144*(2), 762–776.  
873 <https://doi.org/10.1016/j.neuroscience.2006.10.006>
- 874 Wang, M., Wong, A. H., & Liu, F. (2012). Interactions between NMDA and dopamine receptors: A  
875 potential therapeutic target. *Brain Research*, *1476*, 154–163.  
876 <https://doi.org/10.1016/j.brainres.2012.03.029>
- 877 Wei, W., Rubin, J. E., & Wang, X.-J. (2015). Role of the Indirect Pathway of the Basal Ganglia in  
878 Perceptual Decision Making. *Journal of Neuroscience*, *35*(9), 4052–4064.  
879 <https://doi.org/10.1523/JNEUROSCI.3611-14.2015>
- 880 Weinberger, M., Mahant, N., Hutchison, W. D., Lozano, A. M., Moro, E., Hodaie, M., Lang, A. E., &  
881 Dostrovsky, J. O. (2006). Beta Oscillatory Activity in the Subthalamic Nucleus and Its Relation to  
882 Dopaminergic Response in Parkinson's Disease. *Journal of Neurophysiology*, *96*(6), 3248–3256.  
883 <https://doi.org/10.1152/jn.00697.2006>
- 884 Willard, A. M., Isett, B. R., Whalen, T. C., Mastro, K. J., Ki, C. S., Mao, X., & Gittis, A. H. (2019). State  
885 transitions in the substantia nigra reticulata predict the onset of motor deficits in models of  
886 progressive dopamine depletion in mice. *ELife*, *8*, e42746. <https://doi.org/10.7554/eLife.42746>

887 Zhuang, P., Hallett, M., Meng, D., Zhang, Y., & Li, Y. (2019). Characteristics of oscillatory activity in the  
888 globus pallidus internus in patients with Parkinson's disease (P1.8-028). *Neurology*, 92(15  
889 Supplement), P1.8-028.  
890

**Figure 1, Whalen et al.**

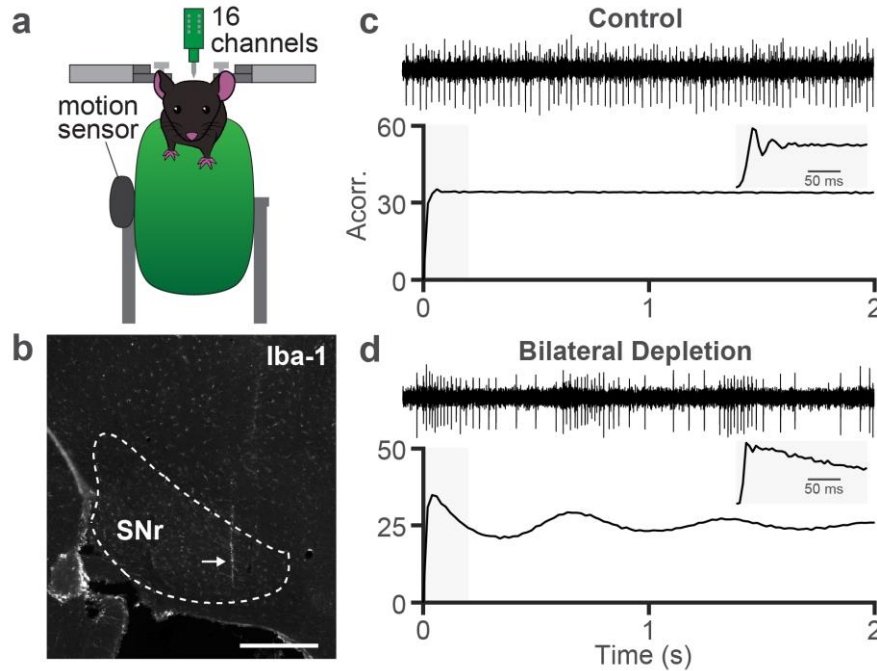

891 **Figure 1. Dopamine depletion leads to low frequency spiking oscillations in SNr units.**

892 **a.** Schematic of recording setup. Mice were head-fixed atop a free-running wheel with attached  
893 movement sensor and single units were recorded with a 16-channel probe. **b.** Example sagittal  
894 slice with IBA immunofluorescence showing location of the recording probe in SNr. Dotted line  
895 indicates approximate location of target nucleus, arrow indicates probe location. Scale bar =  
896 500  $\mu\text{m}$ . **c.** Two seconds of an example SNr unit firing from a control animal (top) and the unit's  
897 autocorrelation (bottom). Inset is zoomed into the first 200 milliseconds of the autocorrelation  
898 using a smaller bin size. **d.** Same as **c** for a bilaterally dopamine depleted animal.

**Figure 2, Whalen et al.**

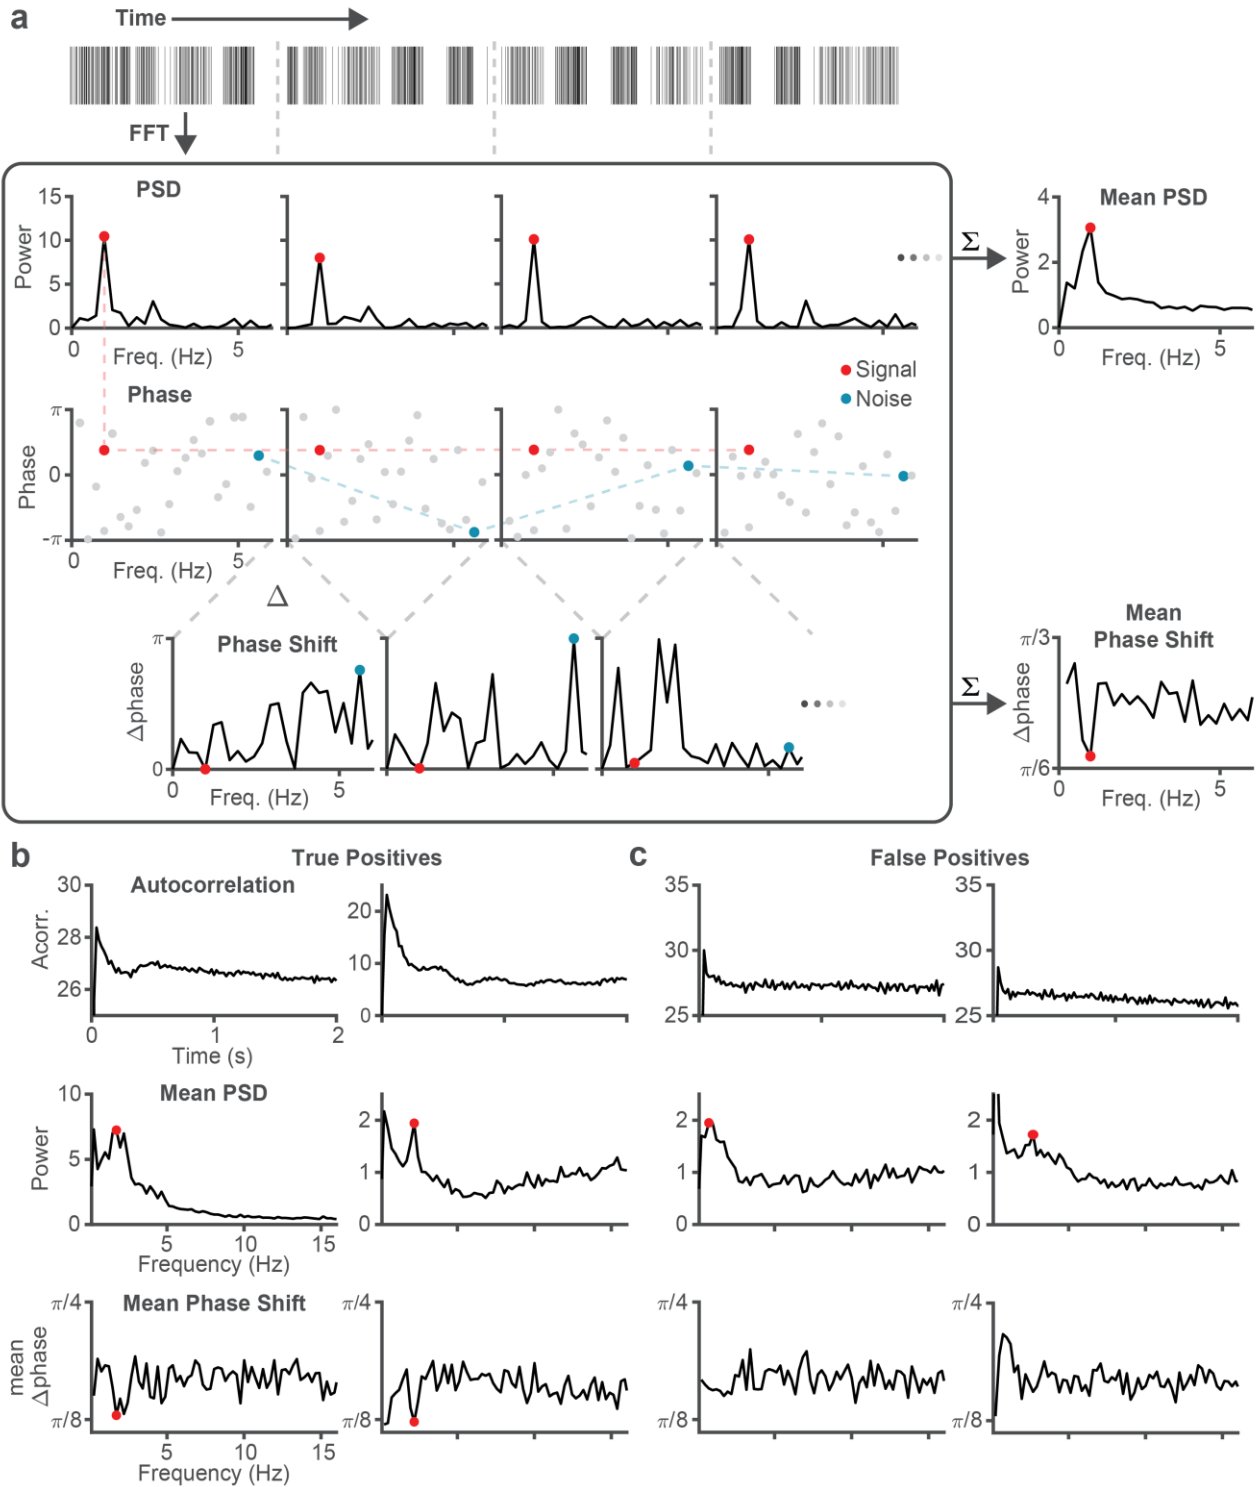

899 **Figure 2. A phase shift measure to distinguish oscillations from noise.**

900 **a.** Diagram of the phase shift oscillation detection method. A spike train is divided into

901 overlapping windows (1st row) and its Fourier transform is computed (corrected for the



## Figure 2, Whalen et al.

902 interspike interval distribution, see Methods). We identify statistically significant peaks in the 0.5-  
903 3 Hz range (compared to a control 100-500 Hz range) in the averaged power spectral density  
904 (PSD) across all windows (2nd row) and label the oscillation phase (3rd row) at that frequency.  
905 Notice while the peak frequency (red) has consistent phase across windows, an arbitrary noise  
906 frequency (blue) has inconsistent phase. We take the absolute circular difference of phases at  
907 each frequency (4th row) and compute whether the frequency identified in the power spectrum  
908 also has statistically significantly lower phase difference than the control band. A spike train  
909 which has both a significant spectral peak and significant phase difference trough at the same  
910 frequency is labeled as oscillating. **b.** Data from two example oscillating units. Top:  
911 Autocorrelation exhibiting oscillations. Middle: Significant peaks (red dots) in the PSD  
912 surrounded by pink noise. Bottom: The phase difference at these detected frequencies is  
913 significantly lower than control frequencies. **c.** Same as **b**, but for two units whose  
914 autocorrelation appears to be non-oscillating yet have a peak in their PSD and which would be  
915 “false positive” detections if only PSD’s were analyzed without the consideration of phase shift.

**Figure 3, Whalen et al.**

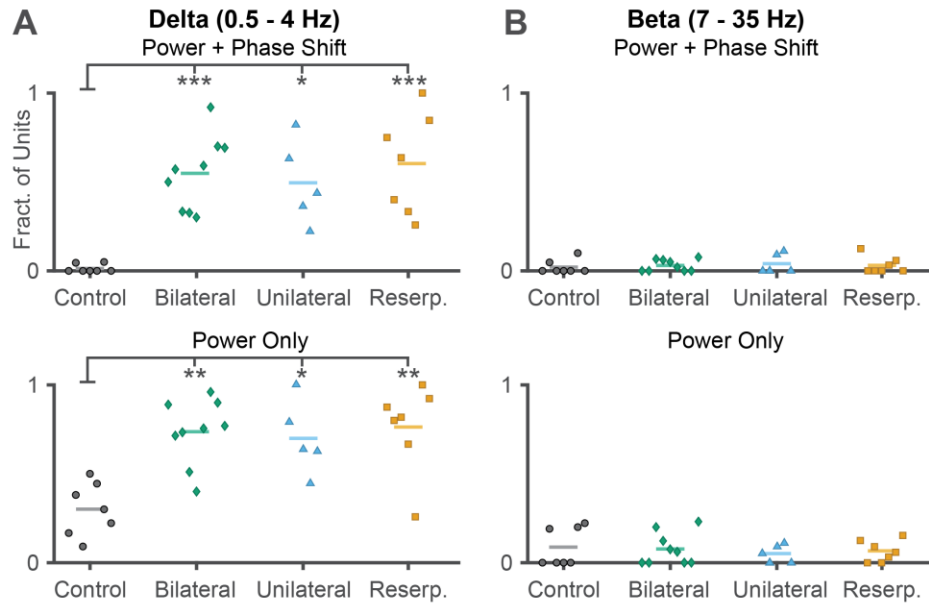

916 **Figure 3. Dopamine depleted, but not control, SNr units exhibit phase-consistent delta**  
 917 **oscillations, but no change in beta oscillations.**

918 Fraction of oscillating units from each animal in control conditions (black circles,  $n = 7$ ) or  
 919 various methods of dopamine depletion – bilateral 6OHDA (green diamond,  $n = 9$ ), unilateral  
 920 6OHDA (blue triangle,  $n = 5$ ), or systemic reserpine (orange square,  $n = 7$ ). Lines indicate  
 921 mean. **a.** Delta (0.5–4 Hz) oscillations detected using both PSD peak and low phase shift  
 922 criteria. ANOVA:  $p = 5.206 \times 10^{-5}$ ; bilateral:  $p = 9.506 \times 10^{-5}$ ; unilateral:  $p = 0.00172$ ; reserpine:  $p =$   
 923  $5.908 \times 10^{-5}$ , Dunnett's post-hoc test. **b.** Same as **a**, but using only the spectral power criterion.  
 924 ANOVA:  $p = 4.668 \times 10^{-4}$ ; bilateral:  $p = 5.645 \times 10^{-4}$ ; unilateral:  $p = 0.00601$ ; reserpine:  $p =$   
 925  $5.794 \times 10^{-4}$ . **c–d.** Same as **a–b**, but for beta (7 – 35 Hz) oscillations. With phase shift, ANOVA:  $p =$   
 926  $0.8936$ ; without phase shift, ANOVA:  $p = 0.8908$

Figure 4, Whalen et al.

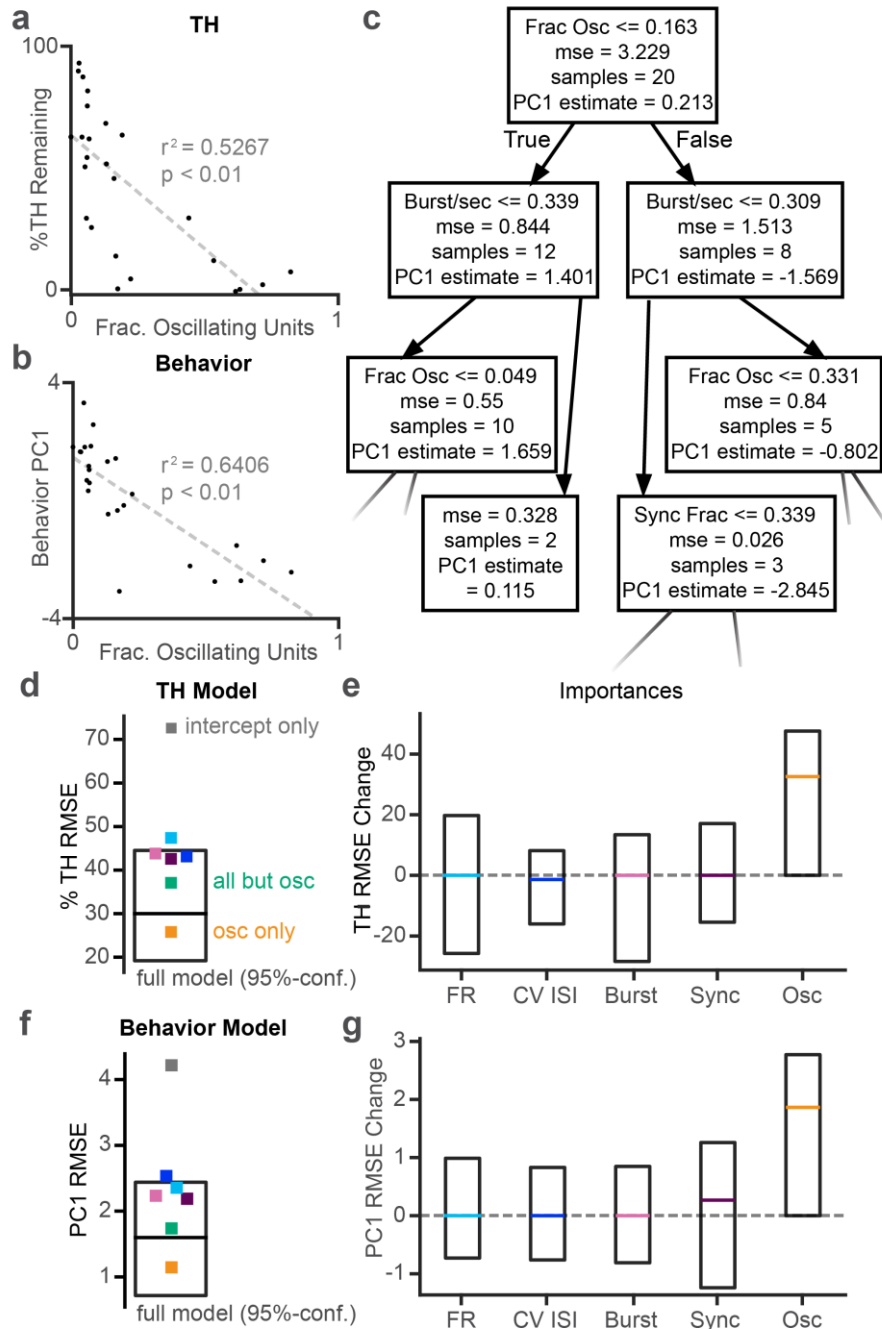

927 **Figure 4. Oscillations predict severity of dopamine depletion.**

928 **a.** Scatterplot showing relationship between levels of remaining striatal TH and fraction of  
929 oscillating SNr units in animals (n=25) gradually dopamine depleted to different severities. Each  
930 dot denotes one animal, dashed line is the least squares fit. **b.** Same as **a** showing relationship  
931 between the first principal component (PC1) of several behavioral metrics (see methods, more

**Figure 4, Whalen et al.**

932 negative indicates more dysfunctional) and the fraction of oscillating SNr units. **c.** The first three  
933 rows of one example decision tree predicting striatal TH from SNr neural properties (firing rate,  
934 irregularity, burstiness, synchronicity and fraction of delta oscillating units). **d.** A 95% confidence  
935 interval of MSE from 1,000 trees predicting TH. Each square is the MSE of the median model  
936 trained using a subset of parameters (grey: intercept-only, i.e. no parameters; light blue: firing  
937 rate; dark blue: CV of interspike intervals; pink: bursts/second; purple: mean synchrony across  
938 pairs; yellow: fraction of delta oscillating units; green: all parameters except fraction of delta  
939 oscillating units). **e.** Middle 95 percentile (box) and median (colored line, same color scheme as  
940 in **d**) of feature importances (permutation importance, see Methods) for each neural measure in  
941 the TH model computed from 1,000 trees. Dotted line indicates zero importance. **f–g.** Same as  
942 **d–e** for the model predicting PC1 of behavior.

**Figure 5, Whalen et al.**

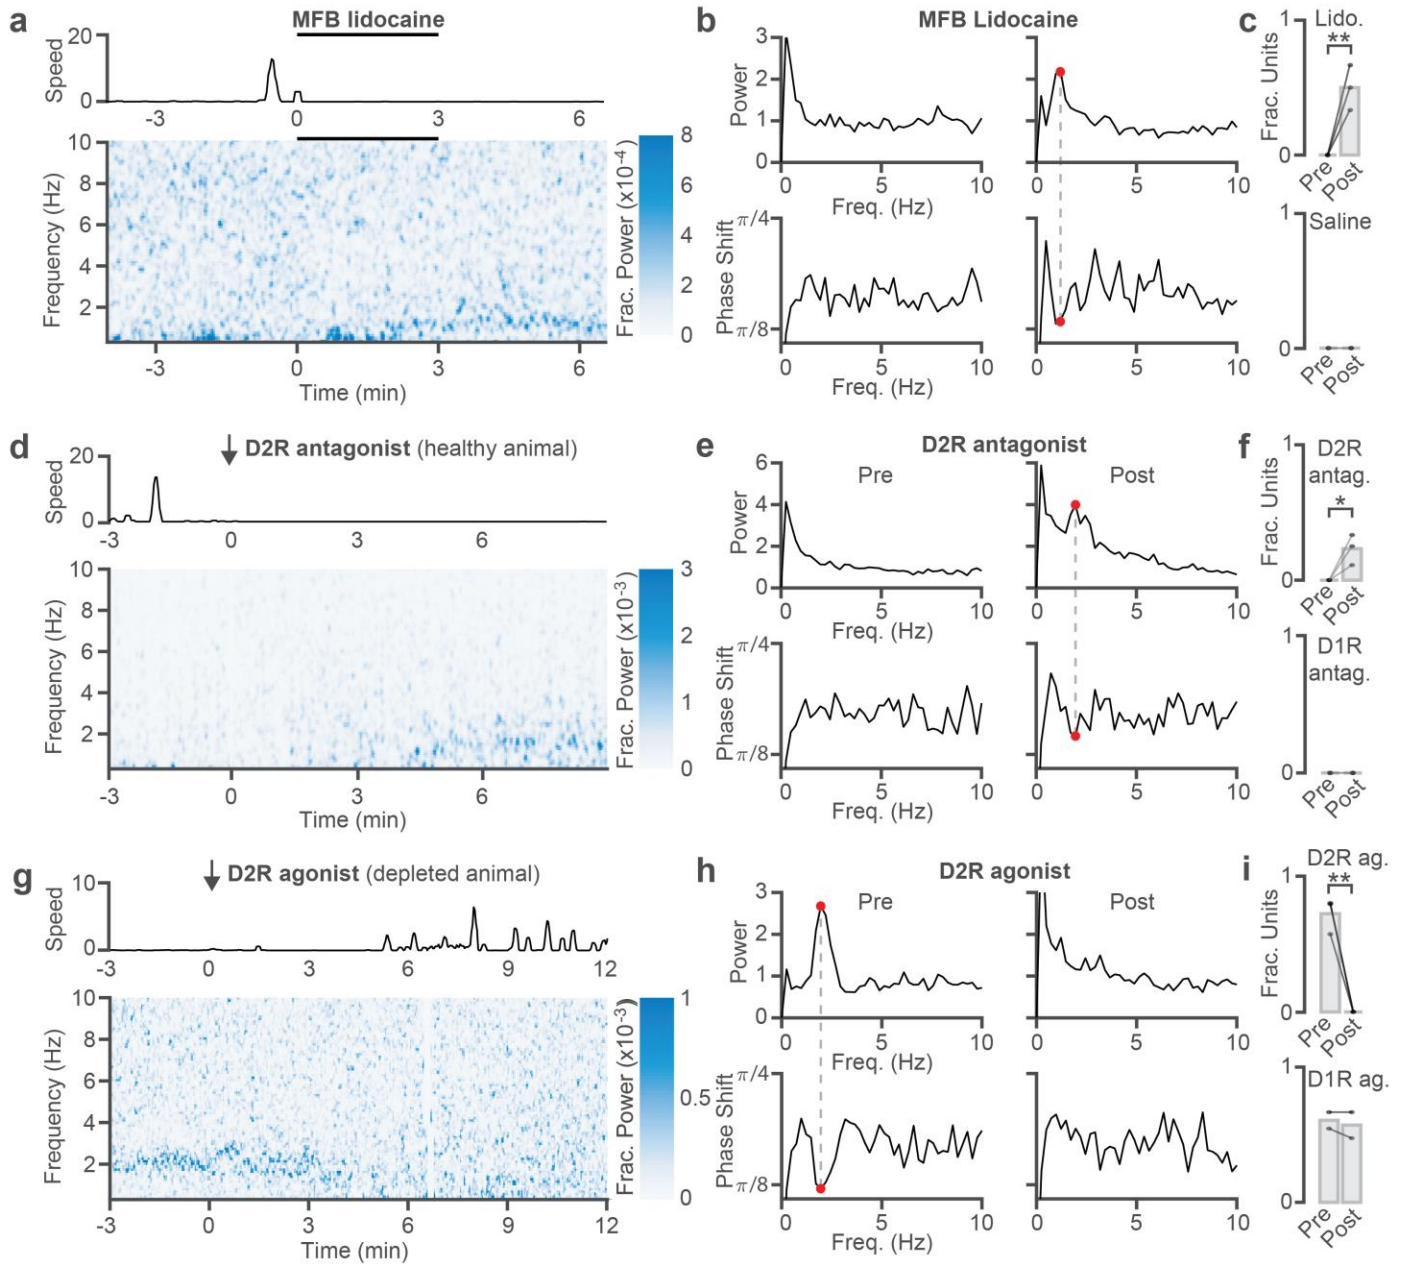

943 **Figure 5: Acute manipulations of MFB signaling or D2-receptors modulate oscillations.**

944 **a.** Effects of lidocaine infusion into the MFB of healthy mice. Top: Speed of mouse on running  
 945 wheel during lidocaine infusion (black bar). Bottom: Spike spectrogram of an example SNr unit  
 946 during the same infusion as above. **b.** Top: PSDs from the same unit before (left) and after  
 947 (right) lidocaine infusion. Bottom: Phase shift plots corresponding to the above PSDs. A dashed  
 948 line from the detected oscillation in the right PSD (red dot) connects to the same frequency in

**Figure 5, Whalen et al.**

949 the corresponding phase shift plot **c**. Fraction of oscillating units from all animals before and  
950 after lidocaine (top,  $n = 3$ ,  $p = 0.00219$ ) or saline (bottom,  $n = 2$ ,  $p = 1.000$ ) infusion into the  
951 MFB. Each dot is one animal, bars indicate mean, and lines connect the same animal before  
952 and after infusion. **d–f**. Same as **a–c**, but for systemic injection of a D2R antagonist (raclopride,  
953  $n = 3$ ,  $p = 0.0233$ ) compared to a D1R antagonist (SCH233890,  $n = 2$ ,  $p = 1.000$ ) **g–i**. Same as  
954 **d–f**, but for systemic injection of a D2R agonist (quinpirole,  $n = 3$ ,  $p = 8.686 \times 10^{-4}$ ) compared to a  
955 D1R agonist (SKF81297,  $n = 2$ ,  $p = 0.7455$ ) in dopamine depleted animals.

**Figure 6, Whalen et al.**

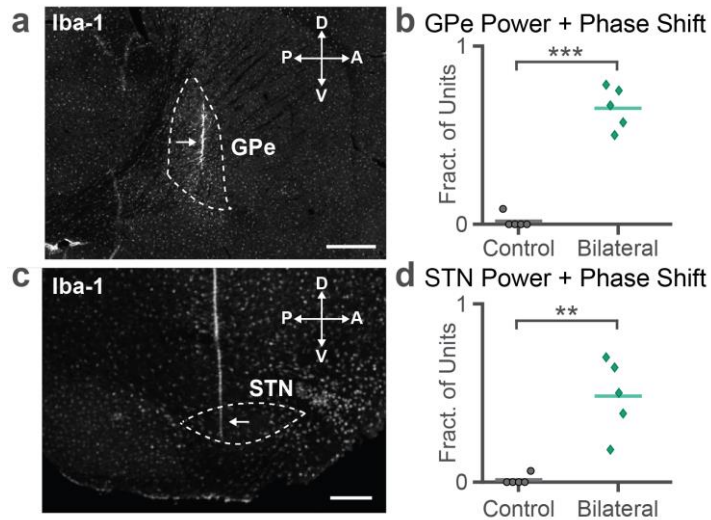

956 **Figure 6: Delta oscillations pervade the dopamine depleted, but not healthy, indirect**  
957 **pathway.**

958 **a.** IBA immunofluorescence showing example probe locations in GPe. Dotted line indicates  
959 approximate location of GPe, arrow indicates probe location. Scale bar = 500  $\mu$ m. **b.** Fraction of  
960 oscillating units from each animal in control (black circles,  $n = 5$ ), or bilateral 6OHDA (green  
961 diamond,  $n = 5$ ) animals in GPe ( $p = 3.847 \times 10^{-6}$ , two-sample t-test). **c–d.** Same as **a–b** targeting  
962 STN ( $p = 0.00106$ , both control and bilateral  $n = 5$ )

**Figure 7, Whalen et al.**

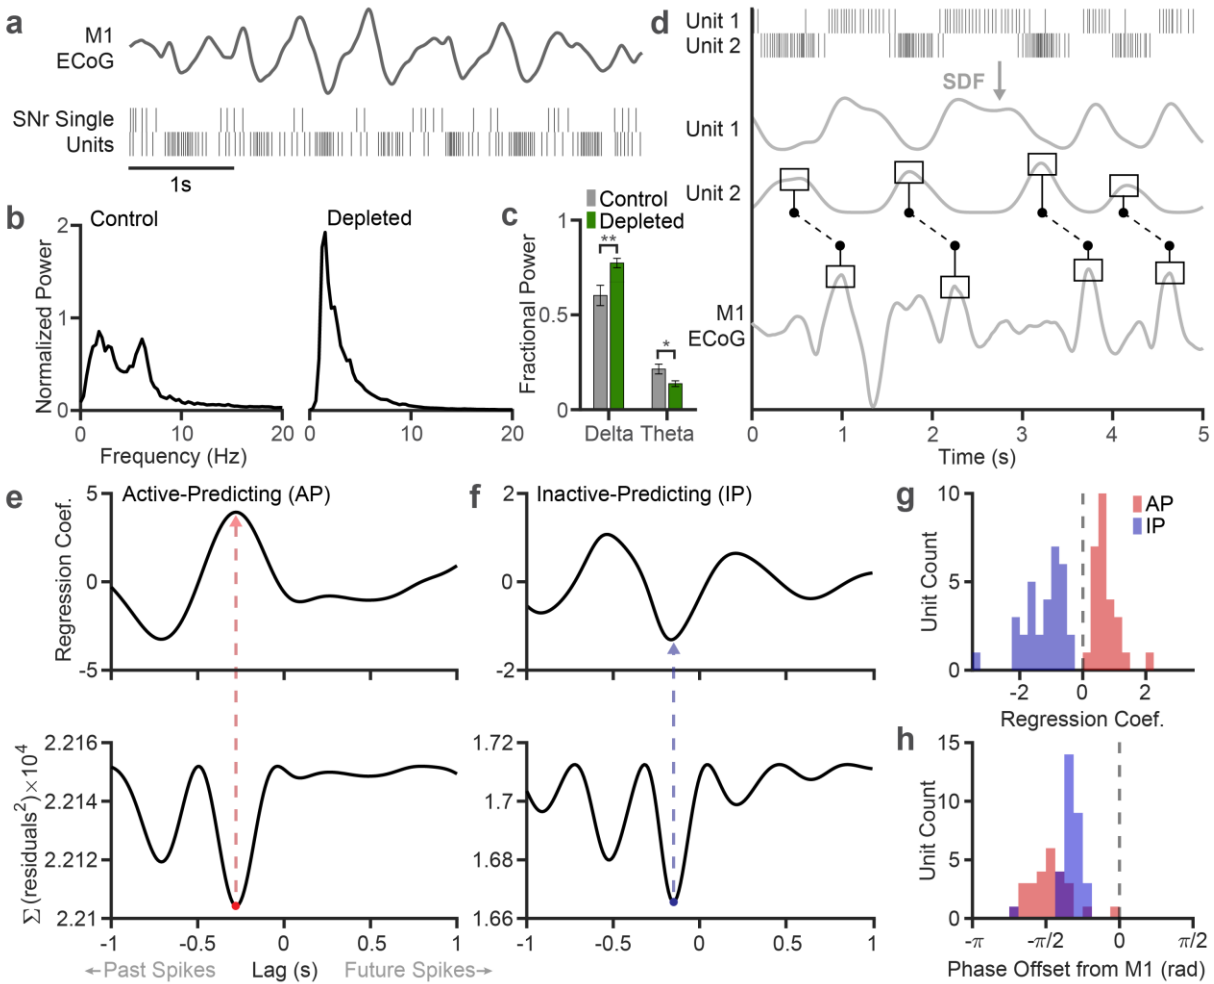

963 **Figure 7: Delta oscillations define two SNr populations which both lead oscillations in M1**

964 **a.** Example simultaneous M1 ECoG and spike trains from two SNr units exhibiting coherent  
 965 oscillations. **b.** Example M1 ECoG power spectra from control (left) and bilaterally depleted  
 966 (right) animals. Power spectra were normalized to their total 0.5-100 Hz power and multiplied by  
 967 1000 for visualization. **c.** Fractional delta and theta band power in M1 ECoG across all control (n  
 968 = 8) and acutely depleted (n = 9) animals. Bars indicate mean, error bars indicate standard error  
 969 ( $p = 0.00818$  for delta,  $0.0173$  for theta, two-sample t-test test). **d.** Example data demonstrating  
 970 SNr predicting M1. Top: 5 second rasters from two simultaneously recorded SNr units. Middle:  
 971 spike density functions (SDF) of the above SNr rasters. Bottom: Simultaneously recorded M1  
 972 ECoG. Lines between the bottom two panels illustrate M1 exhibiting peaks at a consistent time



**Figure 7, Whalen et al.**

973 lag after the peak of an SNr SDF, even amidst variance in oscillation period length. **e.** Example  
974 regression results predicting M1 ECoG from an “active-predicting” (AP) SNr unit. Top:  
975 Regression coefficients for each individual lag. Negative lag corresponds to SNr oscillations  
976 leading M1. Bottom: MSE of regression results using each lag. The red dot indicates that the  
977 model using that lag significantly outperforms an autoregressive model of the ECoG (F-test,  $p <$   
978  $0.05$  correcting for multiple lag comparisons). The dotted line to the upper panel lands at a peak  
979 in the coefficients, defining the unit as “active-predicting”. **f.** Same as **e** for an “inactive-  
980 predicting” (IP) SNr unit, whose significant lag is labeled in blue. **g.** Summary histogram of  
981 regression coefficients from all oscillating SNr units recorded simultaneously with M1 ECoG ( $n =$   
982  $59$ ). Counts are colored as in **e–f** based on their regression coefficients (red: positive, blue:  
983 negative, dashed line at zero), which define their type (AP or IP). **h.** Same units colored as  
984 above grouped by the phase offset at which they best predict the M1 ECoG (as in **e–f**, negative  
985 phase offsets correspond to SNr oscillations leading changes in M1).

Figure 8, Whalen et al.

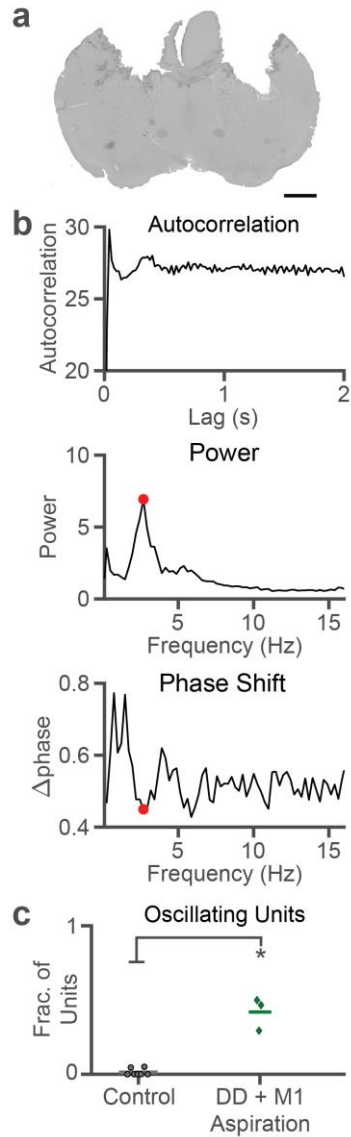

986 **Figure 8: M1 lesion does not disrupt oscillations in SNr**

987 **a.** Example coronal slice from an M1 lesioned animal. Scale bar = 1 mm. **b.** Autocorrelation  
988 (top), PSD (middle) and phase shift (bottom) for an example SNr unit exhibiting a delta  
989 oscillation in an M1-lesioned, dopamine depleted animal. **c.** Fraction of oscillating units in SNr  
990 for each animal in control (black circle, n = 7) and bilaterally dopamine depleted with M1 lesion  
991 (dark green diamond, n = 3) conditions ( $p = 1.1478 \times 10^{-6}$ , two-sample t-test.)

## Supplemental Figures, Whalen et al.

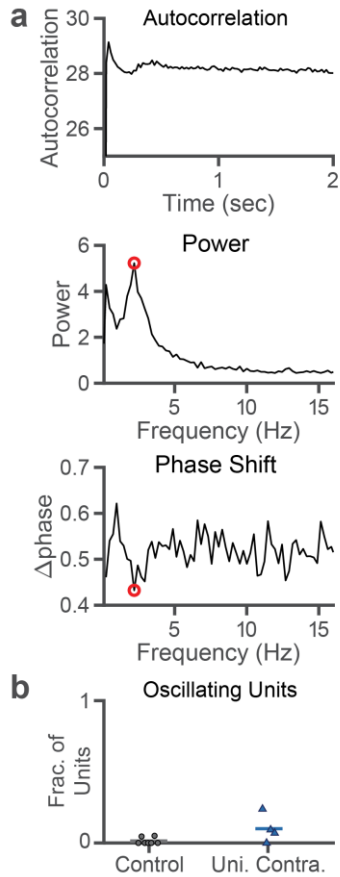

992 **Figure 3 – Figure Supplement 1: Unilaterally depleted animals exhibit a small number of**  
993 **delta oscillating units in the SNr of their dopamine intact hemisphere.**

994 **a.** Example autocorrelation (top), PSD (middle) and phase shift (bottom) for an example SNr  
995 unit exhibiting a delta oscillation in the intact hemisphere of a unilaterally depleted animal. **b.**  
996 Fraction of oscillating units in SNr for each control animal (black circle,  $n = 7$ ) and in the intact  
997 hemisphere of unilaterally depleted animals (dark blue triangle,  $n = 4$ ). The difference between  
998 these conditions is not significant at the  $\alpha = 0.05$  level ( $p = 0.1138$ , two-sample t-test).

## Supplemental Figures, Whalen et al.

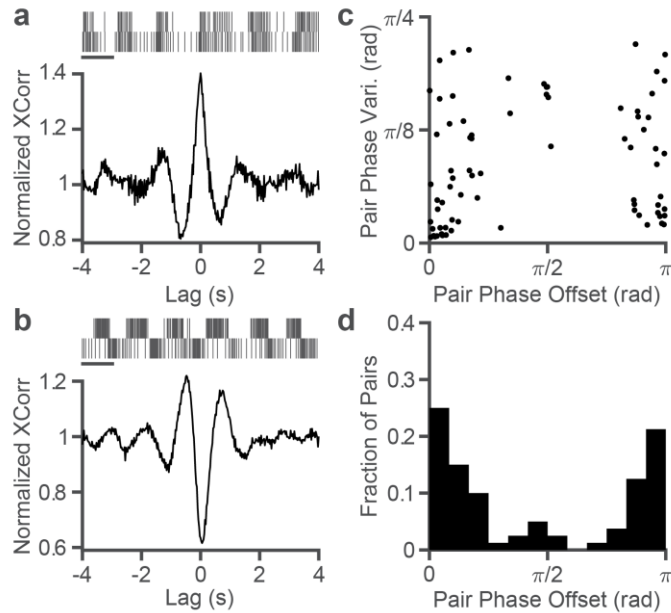

999 **Figure 7 – Figure Supplement 1: Pairwise phase relationships corroborate the existence**  
1000 **of two populations of oscillating units in dopamine depleted SNr.**

1001 **a.** Top: Spike rasters from a pair of simultaneously recorded SNr units, scale bar = 1 s. Bottom:  
1002 Normalized cross correlations (see Neural Measures section of Methods) of the above pairs  
1003 demonstrating an in-phase relationship. **b.** Same as **a** for a near anti-phase relationship. **c.**  
1004 Scatterplot of all pairs of oscillating units. The horizontal axis measures their mean phase offset  
1005 (0 indicating in phase,  $\pi$  indicating antiphase), and the vertical axis measures circular variance  
1006 of phase offset computed across time windows. **d.** Histogram collapsing the above scatterplot to  
1007 show counts of pairs based on their phase difference.
